# Supplementary material
Source: PubMed Central journal article supplement (PMC2916362)
Supplement: supp_192_15_3915__1.pdf [file supp_192_15_3915__1.pdf]

## Hoover and Burkholder (2010) - Supplemental information

### Contents:

**Supplemental Materials and Methods:** Flow cytometry; DNA microarray and statistical analysis; plasmid and strain construction.

**Figure S1.** Sporulation-specific gene expression is induced when cells enter stationary phase in LB supplemented with at least 1  $\mu\text{M}$   $\text{MgCl}_2$ .

**Figure S2.** Supplementation of LB medium with L-malate had little or no effect on sporulation-specific gene expression.

**Table S1.** Plasmids used in this study.

**Table S2.** Oligonucleotides used in this study.

**Table S3.** Fold-differences in relative expression for genes in the DnaA regulon.

**Table S4.** Fold-differences in relative expression for genes in the Fur regulon.

**Table S5.** Operons with genes that are significantly repressed ( $q \leq 0.005$ ) at T3 in an *sda*-dependent manner in the absence of Mn(II).

**Table S6.** Genes with significant changes in expression ( $q \leq 0.05$ ) at the mid-exponential time point.

**Table S7.** Fold-differences in relative expression for genes in the PerR regulon.

The following two tables are provided as separate files:

**Table S8.** Fold-differences in relative gene expression sorted by regulon.

**Table S9.** Complete microarray data and statistical analysis.

## Hoover and Burkholder (2010) - Supplemental information

### Supplemental Materials and Methods

#### Replication run out flow cytometry

Samples of BB1185 (*sda*<sup>+</sup>) and SH455 ( $\Delta$ *sda*) were grown in LB and LB+100  $\mu$ M MnCl<sub>2</sub> at 26°C to mid exponential phase (OD<sub>600</sub> of 0.3-0.5) or at 37°C to 3 hours after the onset of stationary phase. The strains contained a *flgM* $\Delta$ 80 mutation that upregulated autolysins, reducing cell chaining for single cell analysis in the flow cytometer (S. Biller, personal communication). At each timepoint, a 5 mL aliquot was removed and chloramphenicol was added to a final concentration of 200  $\mu$ g/mL, then incubated at 30°C for 6 hours to allow current rounds of DNA replication to finish while inhibiting initiation of new rounds of replication. After the 6 hour incubation, the samples were diluted to an OD<sub>600</sub> of 0.1 with T-base medium and 11 mL of cold 100% ethanol (-20°C) was added to 4 mL of diluted sample and promptly mixed to fix the cells. The fixed cells were allowed to incubate for at least 15 minutes before being pelleted by centrifugation at 8000 x *g* for 10 minutes at 4°C. The cell pellets were washed twice with equal volumes of 200 mM of Tris-HCl at pH 7.5 and then resuspended in 2 mL of 200 mM of Tris-HCl at pH 7.5. Samples were incubated with 100  $\mu$ g/mL of RNase A (Sigma) at 60°C for 1 hour then stained with 5  $\mu$ g/mL Propidium Iodide (Molecular Probes). The stained samples were incubated for 5 minutes at room temperature and 1 to 20 dilutions were made of each sample using 200 mM of Tris-HCl at pH 7.5 with 5  $\mu$ g/mL Propidium Iodide. The amount of DNA per cell was measured on a BD FACSCalibur Flow Cytometer (BD Biosciences) for 10,000 cells, thus indicating the number of origins of replication at the time of chloramphenicol treatment for the population.

## Hoover and Burkholder (2010) - Supplemental information

### DNA microarrays and statistical analysis

DNA microarray slides consisting of >99% of the annotated protein coding sequences in *B. subtilis* were prepared by spotting onto CMT-GAPS slides (Corning) as described in Britton *et al.* (2002). JH642 (*sda*<sup>+</sup>) and BB668 ( $\Delta$ *sda*) samples were grown at 37°C in LB or LB supplemented with 100  $\mu$ M MnCl<sub>2</sub> to mid exponential phase (OD<sub>600</sub> of 0.3-0.5), T<sub>0</sub> (the onset of stationary phase), and T<sub>3</sub> (3 hours after the onset of stationary phase) for RNA extraction for use in the DNA microarrays. Three biological replicates were collected for each sample at each timepoint. Samples were immediately mixed with an equal volume of cold methanol at -20°C and kept on ice for 2 minutes before centrifugation for 5 minutes at 4°C. Cell pellets were stored at -80°C until RNA extraction. RNA was isolated using RNeasy mini kits (Qiagen), treating with DNase on the column as described in the manufacturer's protocol to remove genomic DNA. The quality of the RNA was assessed by running approximately 2  $\mu$ g of RNA on a 1% agarose gel and visualizing the 23S and 16S bands. Reference RNA was generated by pooling RNA from all samples.

Labeled cDNA was generated from 10  $\mu$ g of RNA from samples or the reference pool as described in Wall *et al.* (10), with sample cDNA labeled with Cy5 and reference cDNA labeled with Cy3. The labeled reference cDNA was pooled and aliquots prepared for each hybridization (aliquots were stored at -80°C). Hybridizations were performed essentially as described previously (10). The array slides were scanned using an Agilent DNA Microarray Scanner (Agilent) and images were processed and analyzed using GenePix 3.0 software (Axon Instruments, Inc.).

For each of the 36 arrays, raw data from GenePix file were background corrected by fitting a normexp model (5) to remove non-target hybridization signal and normalized using loess method

## Hoover and Burkholder (2010) - Supplemental information

to remove systematic intensity-dependent bias. To identify the genotype and manganese effect at each time point, we fitted a two-way factorial model for each gene:

$$y_{ijk} = \mu + \alpha_i + \beta_j + \gamma_{ij} + \varepsilon_{ijk},$$

where  $y_{ijk}$  is the gene expression under condition  $(\alpha_i, \beta_j)$ ,  $\mu$  is the base line expression level,  $\alpha_i$  is the gene expression response to genotype  $i$  (1: wild type; 2: mutant),  $\beta_j$  is the gene expression response to manganese state  $j$  (1: +Mn(II); 2: -Mn(II)),  $\gamma_{ij}$  is the genotype-dependent gene expression response to manganese state, and  $\varepsilon_{ijk}$  is a Gaussian error. From the model, we estimated the main effects of manganese, genotype and interaction at each timepoints and computed their significance using moderated t-statistic. The estimated effects were then tested across time using F-statistic to check if they changed over time. All the model fittings and statistical tests were carried out in Bioconductor package LIMMA (3, 7). For all statistical tests involved, false discovery rate is estimated by converting p-values into q-values according to ref. (8). Relative differences in gene expression for several regulons and other groups of genes are shown in Tables S3-S7 (provided in the same file as the supplementary materials and methods, Figs. S1, and Tables S1-S2). Relative differences in gene expression for all regulons (for which we have annotations based on DBTBS and other references) are listed in Table S8, provided as a separate PDF file. The microarray data and statistical analysis are provided as an Excel file (Table S9), and the data will be deposited in the Stanford Microarray Database.

## Plasmid and strain construction

The plasmids used in this study are listed in Table S1 and were constructed by amplification of genomic DNA by PCR then digestion and ligation of the insert and vector plasmid. The specific oligonucleotides used to amplify the insert as well as the vector plasmid identity and

## Hoover and Burkholder (2010) - Supplemental information

enzymes used for each plasmid constructed are detailed in Table S1. Oligonucleotide sequences used in this study are listed in Table S2.

The following strains were generated through plasmid integration by double crossover at either *amyE* or *thrC*: AM48 (*amyE*), BB424 (*amyE*), KM81 (*amyE*), KM96 (*amyE*), SH350 (*thrC*), SH507 (*amyE*), SH517 (*amyE*), and SH536 (*amyE*). The strain containing *flgM* $\Delta$ 80 and  $\Delta$ *sda* (SH455) was constructed in several steps due to the fact that both mutations do not contain selectable markers. First, an *aroD*::*erm* deletion allele was created using long flanking homology PCR (9) with the oligonucleotides OSH78, OSH79, OSH99, OSH100, OSH101, and OSH102, and integrating the resulting DNA fragment into the chromosome of BB1185 (*flgM* $\Delta$ 80). By transformation, *sda* is approximately 95% linked to *aroD* (2, 6). The  $\Delta$ *sda* allele was moved into the *flgM* $\Delta$ 80 background by transforming SH430 with genomic DNA from BB668 ( $\Delta$ *sda*) and selecting for *aroD*<sup>+</sup> on agar plates as described in reference (6). The presence of the  $\Delta$ *sda* allele was confirmed by PCR analysis of the locus using oligonucleotides OBB29 and OBB40.

## References

1. **Antoniewski, C., B. Savelli, and P. Stragier.** 1990. The *spoIIIJ* gene, which regulates early developmental steps in *Bacillus subtilis*, belongs to a class of environmentally responsive genes. *J. Bacteriol.* **172**:86-93.
2. **Burkholder, W. F., I. Kurtser, and A. D. Grossman.** 2001. Replication initiation proteins regulate a developmental checkpoint in *Bacillus subtilis*. *Cell* **104**:269-79.
3. **Gentleman, R. C., V. J. Carey, D. M. Bates, B. Bolstad, M. Dettling, S. Dudoit, B. Ellis, L. Gautier, Y. Ge, J. Gentry, K. Hornik, T. Hothorn, W. Huber, S. Iacus, R. Irizarry, F. Leisch, C. Li, M. Maechler, A. J. Rossini, G. Sawitzki, C. Smith, G. Smyth, L. Tierney, J. Y. Yang, and J. Zhang.** 2004. Bioconductor: open software development for computational biology and bioinformatics. *Genome Biol* **5**:R80.
4. **Guerout-Fleury, A. M., N. Frandsen, and P. Stragier.** 1996. Plasmids for ectopic integration in *Bacillus subtilis*. *Gene* **180**:57-61.
5. **Ritchie, M. E., J. Silver, A. Oshlack, M. Holmes, D. Diyagama, A. Holloway, and G. K. Smyth.** 2007. A comparison of background correction methods for two-colour microarrays. *Bioinformatics* **23**:2700-7.
6. **Ruvolo, M. V., K. E. Mach, and W. F. Burkholder.** 2006. Proteolysis of the replication checkpoint protein Sda is necessary for the efficient initiation of sporulation after transient replication stress in *Bacillus subtilis*. *Mol. Microbiol.* **60**:1490-508.
7. **Smyth, G. K.** 2004. Linear models and empirical bayes methods for assessing differential expression in microarray experiments. *Stat Appl Genet Mol Biol* **3**:Article3.
8. **Storey, J. D., and R. Tibshirani.** 2003. Statistical significance for genomewide studies. *Proc Natl Acad Sci U S A* **100**:9440-5.
9. **Wach, A.** 1996. PCR-synthesis of marker cassettes with long flanking homology regions for gene disruptions in *S. cerevisiae*. *Yeast* **12**:259-65.
10. **Wall, T., K. Bath, R. A. Britton, H. Jonsson, J. Versalovic, and S. Roos.** 2007. The early response to acid shock in *Lactobacillus reuteri* involves the ClpL chaperone and a putative cell wall-altering esterase. *Appl. Environ. Microbiol.* **73**:3924-35.

**Figure legends**

**Fig. S1.** Sporulation-specific gene expression is induced when cells enter stationary phase in LB supplemented with at least 1  $\mu\text{M}$   $\text{MgCl}_2$ .

Cells were grown in LB medium at 37°C to an  $\text{OD}_{600}$  of 0.3-0.5 and diluted back to an  $\text{OD}_{600}$  of 0.02 into fresh, prewarmed LB medium or LB medium supplemented with 0.1, 1, 10, or 100  $\mu\text{M}$   $\text{MnCl}_2$  (as indicated) and then grown until 3 hours after exit from exponential growth.

Sporulation-specific gene expression was monitored using a *lacZ* transcriptional fusion to *spoIIE*. Symbols: squares, 0  $\mu\text{M}$   $\text{Mn}(\text{II})$ ; diamonds, 0.1  $\mu\text{M}$   $\text{Mn}(\text{II})$ ; triangles, 1  $\mu\text{M}$   $\text{Mn}(\text{II})$ ; circles, 10  $\mu\text{M}$   $\text{Mn}(\text{II})$ ; x, 100  $\mu\text{M}$   $\text{Mn}(\text{II})$ . Strains: BB825 (*sda*<sup>+</sup> *amyE*::*P*<sub>*spoIIE*</sub>-*lacZ*); diamonds, BB827 ( $\Delta$ *sda amyE*::*P*<sub>*spoIIE*</sub>-*lacZ*).

**Fig. S2. Supplementation of LB medium with L-malate had little or no effect on sporulation specific gene expression.**

Cells were grown in LB medium at 37°C to an  $\text{OD}_{600}$  of 0.3-0.5 and diluted back to an  $\text{OD}_{600}$  of 0.02 into fresh, prewarmed LB medium or LB medium supplemented with 15 mM L-malate, 15 mM L-malate and 15 mM KCl, 15 mM L-malate and 100  $\mu\text{M}$   $\text{MnCl}_2$ , or 100  $\mu\text{M}$   $\text{MnCl}_2$  (as indicated) and then grown until 4.5 hours after exit from exponential growth. Sporulation-specific gene expression was monitored using a *lacZ* transcriptional fusion to *spoIIE*. Symbols: squares, LB; diamonds, LB with 15 mM L-malate; triangles, LB with 15 mM L-malate and 15 mM KCl; circles, LB with 15 mM L-malate and 100  $\mu\text{M}$   $\text{Mn}(\text{II})$ ; x, LB with 100  $\mu\text{M}$   $\text{Mn}(\text{II})$ . Strains: BB825 (*sda*<sup>+</sup> *amyE*::*P*<sub>*spoIIE*</sub>-*lacZ*); diamonds, BB827 ( $\Delta$ *sda amyE*::*P*<sub>*spoIIE*</sub>-*lacZ*).

Hoover and Burkholder (2010) - Supplemental information

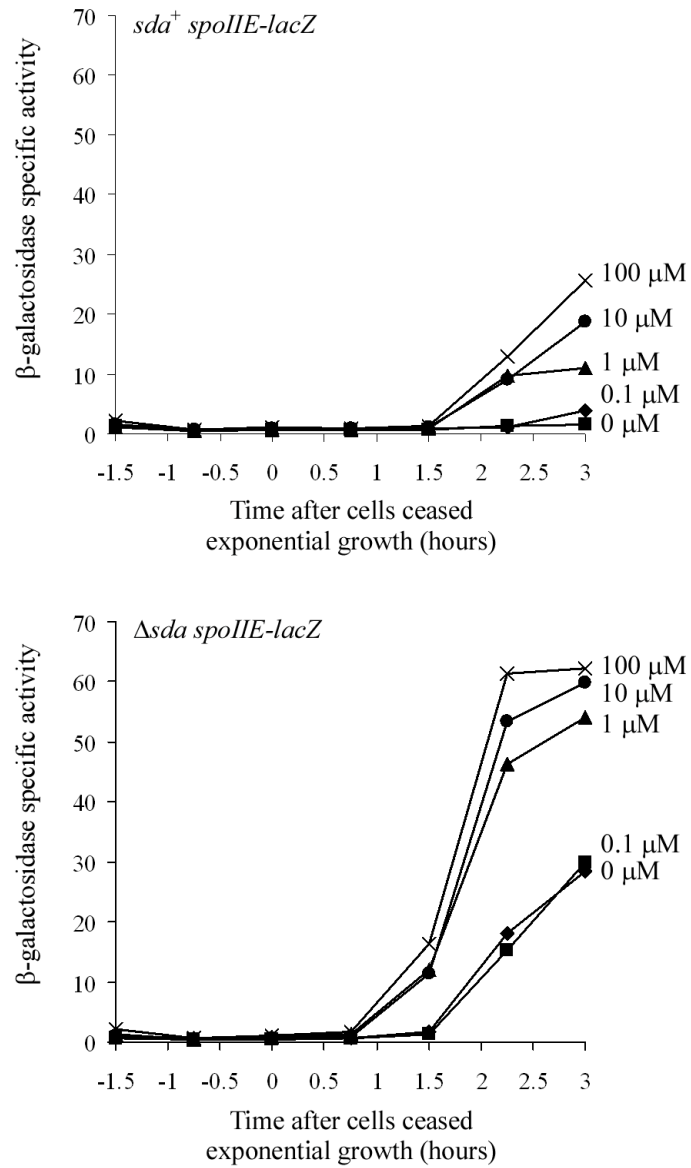

Figure S1



Hoover and Burkholder (2010) - Supplemental information

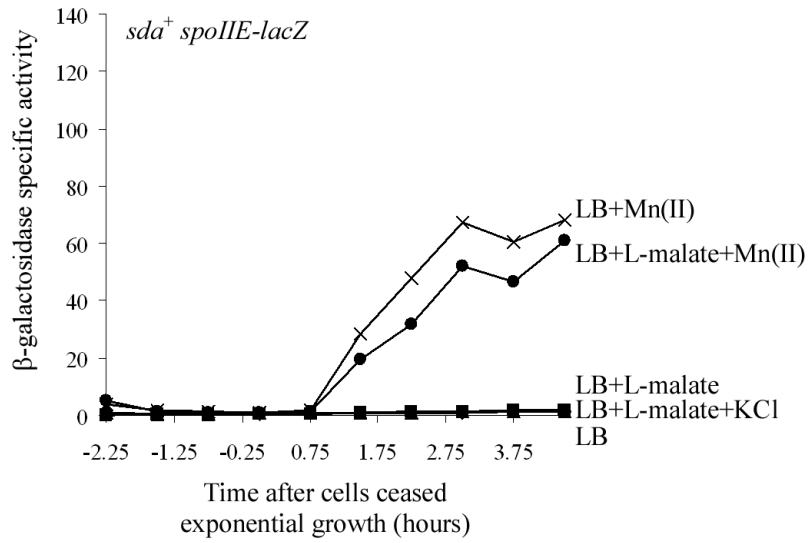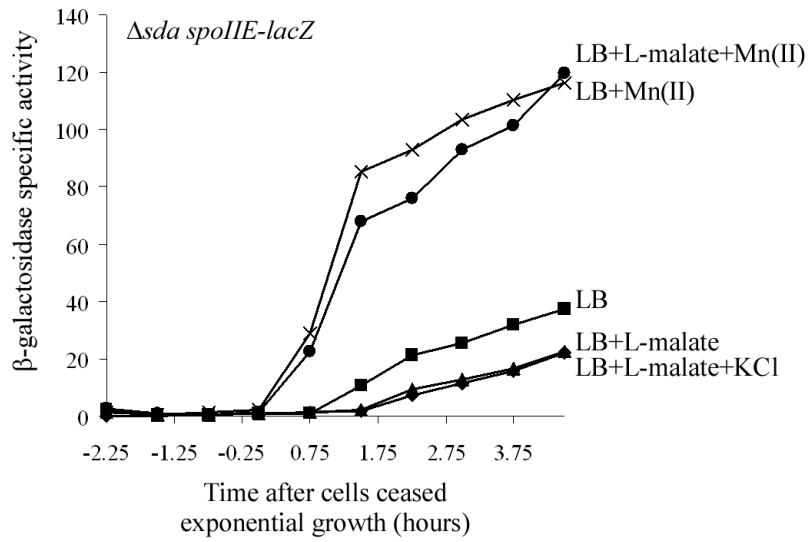

Figure S2

## Hoover and Burkholder (2010) - Supplemental information

**Table S1.** Plasmids used in this study.

| Plasmid | Description                                                                                                                                                                                                                                                                        | Source                         |
|---------|------------------------------------------------------------------------------------------------------------------------------------------------------------------------------------------------------------------------------------------------------------------------------------|--------------------------------|
| pAM30   | pDG1661 derived plasmid expressing P <sub>yneA</sub> - <i>lacZ</i> at <i>amyE</i> . The promoter for <i>yneA</i> was amplified from JH642 by PCR using oligonucleotides OAM49 and OAM50 and ligated into pDG1661 following digestion of insert and plasmid with EcoRI and HindIII. | Burkholder lab (Allison Mo)    |
| pBB73   | pDG268 derived plasmid expressing P <sub>ywIC</sub> - <i>lacZ</i> at <i>amyE</i> . The promoter for <i>ywIC</i> was amplified from JH642 by PCR using oligonucleotides OBB4 and OBB5 and ligated into pDG268 following digestion of insert and plasmid with EcoRI and BamHI.       |                                |
| pBB153  | pDG268 derived plasmid expressing P <sub>dnaA</sub> - <i>lacZ</i> at <i>amyE</i> . The promoter for <i>dnaA</i> was amplified from JH642 by PCR using oligonucleotides OBB55 and OBB56 and ligated into pDG268 following digestion of insert and plasmid with HindIII and BamHI.   |                                |
| pBB159  | pDG268 derived plasmid expressing P <sub>sda</sub> - <i>lacZ</i> at <i>amyE</i> . The promoter for <i>sda</i> was amplified from JH642 by PCR using oligonucleotides OBB61 and OBB65 and ligated into pDG268 following digestion of insert and plasmid with EcoRI and BamHI.       |                                |
| pDG268  | <i>amyE</i> ::( <i>lacZ cat</i> ); Amp <sup>R</sup>                                                                                                                                                                                                                                | (1)                            |
| pDG1661 | <i>Spc amyE</i> ::( <i>lacZ cat</i> ); Amp <sup>R</sup>                                                                                                                                                                                                                            | (4)                            |
| pDG1663 | <i>Spc thrC</i> ::( <i>lacZ erm</i> ); Amp <sup>R</sup>                                                                                                                                                                                                                            | (4)                            |
| pDG1731 | <i>Erm amyE</i> integration plasmid with <i>spc</i> marker; Amp <sup>R</sup>                                                                                                                                                                                                       | (4)                            |
| pEA18   | <i>Spc amyE</i> ::(P <sub>xylA</sub> - <i>spoVG-gfp xylR cat</i> ); Amp <sup>R</sup>                                                                                                                                                                                               | Esther Angert                  |
| pKM32   | pDG1731 derived plasmid with <i>gfp</i> inserted at <i>amyE</i> . The sequence for <i>gfp</i> was amplified from pEA18 by PCR using oligonucleotides OKM7 and OKM8 and ligated into pDG1731 following digestion of insert with BglII and BamHI and plasmid with BamHI.             | Burkholder lab (Kathleen Mach) |

## Hoover and Burkholder (2010) - Supplemental information

|        |                                                                                                                                                                                                                                                               |                                |
|--------|---------------------------------------------------------------------------------------------------------------------------------------------------------------------------------------------------------------------------------------------------------------|--------------------------------|
| pKM36  | pKM32 derived plasmid expressing P <sub>spoIIE-gfp</sub> at amyE.<br>The promoter for spoIIE was amplified from JH642 by PCR using oligonucleotides OBB81 and OBB82 and ligated into pKM32 following digestion of insert and plasmid with EcoRI and BamHI.    | Burkholder lab (Kathleen Mach) |
| pSB220 | pDG1663 derived plasmid expressing P <sub>tagC-lacZ</sub> at thrC.<br>The promoter for tagC was amplified from JH642 by PCR using oligonucleotides OBB167 and OBB168 and ligated into pDG1663 following digestion of insert and plasmid with EcoRI and BamHI. | Burkholder lab (Steven Biller) |
| pSH53  | pDG1661 derived plasmid expressing P <sub>katA-lacZ</sub> at amyE.<br>The promoter for katA was amplified from JH642 by PCR using oligonucleotides OSH84 and OSH85 and ligated into pDG1661 following digestion of insert and plasmid with EcoRI and BamHI.   |                                |
| pSH57  | pKM32 derived plasmid expressing P <sub>katA-gfp</sub> at amyE.<br>The promoter for katA was amplified from JH642 by PCR using oligonucleotides OSH84 and OSH85 and ligated into pKM32 following digestion of insert and plasmid with EcoRI and BamHI.        |                                |

---

All plasmids replicate in *E. coli* from pBR322-derived origins of replication. Amp<sup>R</sup> confers ampicillin resistance in *E. coli*.

## Hoover and Burkholder (2010) - Supplemental information

**Table S2.** Oligonucleotides used in this study.

| Primer | Sequence                                                |
|--------|---------------------------------------------------------|
| OAM49  | 5'-gcgggatcc <u>gaattc</u> ttttcgcacctcaaacgtcg-3'      |
| OAM50  | 5'-gcgaagcttaacctccaacaggaatgttg-3'                     |
| OBB4   | 5'-cccggatcccacgccccgcttttttagcc-3'                     |
| OBB5   | 5'-ggaattcgcgtctggataagtgc-3'                           |
| OBB29  | 5'-ggcggatccgtcgaaaaaatcgaactgcg-3'                     |
| OBB40  | 5'-ctgaaaatagtagtaaagcgcgcagc-3'                        |
| OBB55  | 5'-gcgaagcttatttcccctaaaatcacgc-3'                      |
| OBB56  | 5'-gcgggatccctttcttagaaaatggcg-3'                       |
| OBB61  | 5'-gcgggatcccatttcggtgctttgaaataag-3'                   |
| OBB65  | 5'-ggcgaattcgtcgaaaaaatcgaactgcg-3'                     |
| OBB81  | 5'-gcggaattccgtacgggtcatcctaacaaatcg-3'                 |
| OBB82  | 5'-gcgggatccctcgttgctgcattatagcg-3'                     |
| OBB167 | 5'-gtattctgatgggaattcaagc-3'                            |
| OBB168 | 5'-gcgggatccacggtttgtctgtacacg-3'                       |
| OKM7   | 5'-cgggatccgggaaaagggtggaac-3'                          |
| OKM8   | 5'-gaagatcttattgtatagttcatccatgcc-3'                    |
| OSH78  | 5'-gatcctaataaatttaaatcaaaaag-3'                        |
| OSH79  | 5'-ctttaatctggcaaccctc-3'                               |
| OSH84  | 5'-gcggaattcgccaaccccgcttcaaaaaaac-3'                   |
| OSH85  | 5'-gcgggatccgcgccccagctagtgtcag-3'                      |
| OSH99  | 5'-ggttgtttgatcgggtgcggag-3'                            |
| OSH100 | 5'-cttttgatatttaaattattaggatccagcttttcatacacctctcccc-3' |
| OSH101 | 5'-gaggggtgccagagttaaagggtgactggacaagagcctaata-3'       |
| OSH102 | 5'-cgggcggaatttggcgaatc-3'                              |

Restriction sites used for cloning are underlined.

**Hoover et al. (2010)**

**Table S3.** Fold-differences in relative expression for genes in the DnaA regulon.

Numbers indicate fold-change (log10)

Brackets: Not significant; q > 0.05 or fold-change < log2 0.6 (= 1.5-fold)

No brackets: Significant; q ≤ 0.005 (asterisk) or q ≤ 0.05 (no asterisk) and fold-change ≥ log2 (0.6) (= 1.5-fold)

| Regulator - Operon - Regulation |                                           | Tm      |         |         |         | T0      |         |         |         | T3      |         |         |         |
|---------------------------------|-------------------------------------------|---------|---------|---------|---------|---------|---------|---------|---------|---------|---------|---------|---------|
|                                 |                                           | Mn +/-  |         | sda +/- |         | Mn +/-  |         | sda +/- |         | Mn +/-  |         | sda +/- |         |
|                                 |                                           | sda+    | sda-    | Mn+     | Mn-     | sda+    | sda-    | Mn+     | Mn-     | sda+    | sda-    | Mn+     | Mn-     |
| <b>DnaA</b>                     | citZ-icd-mdh CcpA (-); CcpC (-); DnaA (+) |         |         |         |         |         |         |         |         |         |         |         |         |
|                                 | citZ Citrate synthase 2                   | [ 1.1 ] | [ 1.1 ] | [ 1.1 ] | [ 1.2 ] | [-1.3]  | [-1.3]  | [-1.1]  | [-1.1]  | [-1]    | -2.3    | [ 1.7 ] | [-1.4]  |
|                                 | icd Isocitrate dehydrogenase [NADP]       | [ 1.2 ] | [-1.1]  | [ 1 ]   | [-1.2]  | [-1.1]  | [-1.5]  | [ 1.5 ] | [ 1.1 ] | -2      | -2.7 *  | 2       | [ 1.5 ] |
|                                 | mdh Malate dehydrogenase                  | [-1]    | [ 1.2 ] | [-1.2]  | [ 1.1 ] | [-1.6]  | [-1.5]  | [ 1.1 ] | [ 1.1 ] | -2.6    | -3.1 *  | [ 1.7 ] | [ 1.4 ] |
| <b>DnaA</b>                     | dhbACEBF DnaA (-) (Indirect?); Fur (-)    |         |         |         |         |         |         |         |         |         |         |         |         |
|                                 | dhbA 2,3-dihydro-2,3-dihydroxybenzoate    | [-1.2]  | [-1.3]  | [ 1.1 ] | [-1]    | -2 *    | -2.4 *  | [ 1.2 ] | [-1]    | -2.5 *  | -2.8 *  | 1.6     | [ 1.5 ] |
|                                 | dhbC Isochorismate synthase dhbC          | [-1.1]  | [-1.5]  | [ 1.2 ] | [-1.2]  | [-2.2]  | -3.2    | [ 1.4 ] | [-1.1]  | [-1.2]  | [ 1.1 ] | [ 1.3 ] | [ 1.8 ] |
|                                 | dhbE 2,3-dihydroxybenzoate-AMP ligase     | [-1]    | [-1.5]  | [ 1.1 ] | [-1.3]  | -1.8    | -2.4 *  | [ 1.2 ] | [-1.1]  | [-1]    | [ 1.3 ] | [-1.2]  | [ 1.1 ] |
|                                 | dhbB Isochorismatase                      | [-1]    | [-1.4]  | [ 1.1 ] | [-1.2]  | -2      | -2.6    | [ 1.2 ] | [-1.1]  | [ 1.1 ] | [ 1.2 ] | [ 1.1 ] | [ 1.3 ] |
|                                 | dhbF Dimodular nonribosomal peptide       | [-1.1]  | [-1.3]  | [ 1.1 ] | [-1.1]  | [-1.4]  | -1.9 *  | [ 1.3 ] | [-1.1]  | [-1.4]  | [-1.4]  | [ 1.5 ] | [ 1.4 ] |
| <b>DnaA</b>                     | dnaAN DnaA (-); Spo0A (-)                 |         |         |         |         |         |         |         |         |         |         |         |         |
|                                 | dnaA Chromosomal replication initiator    | [ 1.5 ] | [ 1.2 ] | [ 1.1 ] | [-1.1]  | 2.1 *   | 1.8 *   | [ 1.3 ] | [ 1 ]   | -1.8 *  | [-1.5]  | 1.6     | 2 *     |
|                                 | dnaN DNA polymerase III subunit beta      | [ 1.1 ] | [ 1.2 ] | [ 1 ]   | [ 1.1 ] | 2       | [ 1.6 ] | [ 1.2 ] | [ 1 ]   | -1.9    | -2.4 *  | [ 1.6 ] | [ 1.2 ] |
| <b>DnaA</b>                     | dnaB-dnaI-ytxB DnaA (-); SigE (+)         |         |         |         |         |         |         |         |         |         |         |         |         |
|                                 | dnaB Replication initiation and membrane  | [-1.8]  | [-1.5]  | [-1.2]  | [-1]    | -1.9 *  | -1.8 *  | [ 1 ]   | [ 1.1 ] | -2.8 *  | -4 *    | [ 1.3 ] | [-1.1]  |
|                                 | dnaI Primosomal protein dnaI              | [-1.1]  | [ 1.1 ] | [ 1 ]   | [ 1.2 ] | [ 1.1 ] | [ 1.1 ] | [ 1.1 ] | [ 1.2 ] | [ 1 ]   | [ 1.1 ] | [ 1 ]   | [ 1.1 ] |
|                                 | ytxB TVP38/TMEM64 family membrane         | [-1.1]  | [-1.1]  | [-1.1]  | [-1]    | [ 1.1 ] | [ 1 ]   | [-1.1]  | [-1.1]  | [-1.2]  | [-1.1]  | [-1.3]  | [-1.2]  |

**Table S3.** Fold-differences in relative expression for genes in the DnaA regulon.

| Regulator   | Operon                                   | Regulation                                | Tm     |        |         |        | T0     |        |         |        | T3     |        |         |        |
|-------------|------------------------------------------|-------------------------------------------|--------|--------|---------|--------|--------|--------|---------|--------|--------|--------|---------|--------|
|             |                                          |                                           | Mn +/- |        | sda +/- |        | Mn +/- |        | sda +/- |        | Mn +/- |        | sda +/- |        |
|             |                                          |                                           | sda+   | sda-   | Mn+     | Mn-    | sda+   | sda-   | Mn+     | Mn-    | sda+   | sda-   | Mn+     | Mn-    |
| <b>DnaA</b> | fla-che                                  | DnaA (-) (Indirect?); SigD (+); Spo0A (-) |        |        |         |        |        |        |         |        |        |        |         |        |
| flgB        | Flagellar basal-body rod protein flgB    |                                           | [-1.1] | [1]    | [1]     | [1.1]  | [1.1]  | [-1.1] | [1.1]   | [-1.1] | -1.9 * | -2.8 * | 1.9     | [1.3]  |
| flgC        | Flagellar basal-body rod protein flgC    |                                           | [-1]   | [-1]   | [1.1]   | [1.1]  | [1.1]  | [1]    | [1.1]   | [1]    | -2     | -2.7 * | 2.2     | [1.6]  |
| fliE        | Flagellar hook-basal body complex        |                                           | [-1.4] | [-1]   | [-1.2]  | [1.2]  | [-1.3] | [1]    | [-1.2]  | [1.1]  | -5 *   | -7.7 * | 2.8 *   | 1.8    |
| fliF        | Flagellar M-ring protein                 |                                           | [-1]   | [-1.1] | [1]     | [-1]   | [-1.1] | [-1.2] | [1]     | [-1.1] | 2.6 *  | 4.3 *  | [-1.5]  | [1.1]  |
| fliG        | Flagellar motor switch protein fliG      |                                           | [1.1]  | [-1.1] | [1.1]   | [-1.1] | [1]    | [-1.1] | [-1]    | [-1.2] | [1.4]  | [1.4]  | [1]     | [1]    |
| fliH        | Probable flagellar assembly protein fliH |                                           | [-1]   | [-1]   | [-1]    | [1]    | [-1.1] | [-1.1] | [1]     | [-1]   | -2.3 * | -1.8 * | [1.3]   | [1.6]  |
| fliI        | Flagellum-specific ATP synthase          |                                           | [-1.1] | [1.1]  | [-1.2]  | [-1]   | [1.1]  | [1.1]  | [-1.1]  | [-1.1] | -2.6 * | -2.8 * | 1.6     | [1.4]  |
| fliJ        | Flagellar fliJ protein                   |                                           | [-1]   | [1]    | [1]     | [1.1]  | [1]    | [-1.1] | [1]     | [-1.1] | 2.8 *  | 7.4 *  | -2.4 *  | [1.1]  |
| ylxF        | FlaA locus 22.9 kDa protein              |                                           | [-1.1] | [-1.3] | [-1]    | [-1.2] | [1.3]  | [1]    | [1.4]   | [1.1]  | -5.1 * | -4.1 * | [1.1]   | [1.4]  |
| fliK        | Probable flagellar hook-length control   |                                           | [-1.1] | [1.1]  | [-1.2]  | [-1]   | [-1.1] | [1]    | [1]     | [1.1]  | -1.7 * | [-1.4] | [1.1]   | [1.4]  |
| ylxG        | FlaA locus uncharacterized protein       |                                           | [-1.1] | [1]    | [-1.1]  | [1]    | [-1.1] | [1.2]  | [-1.2]  | [1.1]  | -1.5   | -1.8 * | 2.2 *   | 1.9 *  |
| flgG (flgE) | Flagellar basal-body rod protein flgG    |                                           | [-1]   | [-1.2] | [1.2]   | [1]    | [1.1]  | [1.3]  | [-1.2]  | [-1]   | -2.2 * | -2.9 * | [1.4]   | [1]    |
| fliL        | Flagellar fliL protein                   |                                           | [1]    | [-1]   | [-1.1]  | [-1.2] | [1.2]  | [1.5]  | [-1.3]  | [-1]   | [1.4]  | 2.3 *  | [-1.5]  | [1.1]  |
| fliM        | Flagellar motor switch protein fliM      |                                           | [-1.1] | [-1.1] | [-1.2]  | [-1.2] | [-1]   | [1.2]  | [-1.2]  | [1]    | [-1.3] | [1]    | [1.1]   | [1.4]  |
| fliY        | Flagellar motor switch phosphatase fliY  |                                           | [-1.1] | [-1.3] | [1.2]   | [-1]   | [1.4]  | [1.3]  | [1.1]   | [1.1]  | -4.7 * | -6.6 * | 2.1     | [1.5]  |
| cheY        | Chemotaxis protein cheY homolog          |                                           | [-1.2] | [-1.1] | [-1.1]  | [-1]   | [1]    | [1]    | [-1]    | [-1]   | [1.3]  | [-1.1] | [1.3]   | [-1]   |
| fliZ        | Flagellar biosynthetic protein fliZ      |                                           | [-1]   | [-1.1] | [1]     | [-1]   | [1.2]  | [1.2]  | [1.1]   | [-1]   | [-1.4] | -1.7   | 2.1     | [1.7]  |
| fliP        | Flagellar biosynthetic protein fliP      |                                           | [-1]   | [-1]   | [-1.1]  | [-1.1] | [1.1]  | [-1.2] | [1.4]   | [1.1]  | -1.6   | [-1.5] | [1.3]   | [1.4]  |
| fliQ        | Flagellar biosynthetic protein fliQ      |                                           | [1]    | [1]    | [1]     | [1]    | [1.2]  | [1.3]  | [-1.1]  | [-1]   | [-1.2] | -1.8 * | [1.4]   | [-1]   |
| fliR        | Flagellar biosynthetic protein fliR      |                                           | [-1]   | [-1]   | [-1.3]  | [-1.2] | [1.4]  | [1.2]  | [1.1]   | [-1.1] | [1.3]  | [-1.2] | [2]     | [1.3]  |
| flhB        | Flagellar biosynthetic protein flhB      |                                           | [-1]   | [1]    | [-1.1]  | [-1.1] | [-1.1] | [1]    | [-1.1]  | [1]    | [-1.1] | [1]    | [1.1]   | [1.3]  |
| flhA        | Flagellar biosynthesis protein flhA      |                                           | [-1]   | [-1]   | [1]     | [-1]   | [-1.2] | [-1.3] | [-1]    | [-1.1] | [-1.2] | [-1.3] | [1.3]   | [1.1]  |
| flhF        | Flagellar biosynthesis protein flhF      |                                           | [1.1]  | [-1.1] | [1]     | [-1.2] | [1.5]  | [1.3]  | [-1]    | [-1.1] | -2.1   | -2.1   | [1]     | [1]    |
| ylxH        | Uncharacterized protein ylxH             |                                           | [-1.1] | [1.1]  | [-1.2]  | [-1.1] | [-1.1] | [1.2]  | [-1.5]  | [-1.2] | [-1]   | [-1.2] | [1.3]   | [1.1]  |
| cheB        | Chemotaxis response regulator            |                                           | [1]    | [-1]   | [1.3]   | [1.2]  | [1.8]  | 2.1    | [-1.4]  | [-1.1] | [-1.3] | -1.7   | [1.1]   | [-1.2] |
| cheA        | Chemotaxis protein cheA                  |                                           | [1]    | [-1.2] | [-1.1]  | [-1.3] | [1.2]  | [1.1]  | [1]     | [-1.1] | -3.6 * | -3.5 * | [1.2]   | [1.3]  |
| cheW        | Chemotaxis protein cheW                  |                                           | [-1.1] | [-1]   | [-1.1]  | [-1]   | [1.3]  | [1]    | [1.2]   | [-1]   | [-1.4] | -1.9 * | 1.8     | [1.3]  |

**Table S3.** Fold-differences in relative expression for genes in the DnaA regulon.

| Regulator   | Operon                               | Regulation                             | Tm      |         |         |         | T0      |         |         |         | T3      |         |         |         |
|-------------|--------------------------------------|----------------------------------------|---------|---------|---------|---------|---------|---------|---------|---------|---------|---------|---------|---------|
|             |                                      |                                        | Mn +/-  |         | sda +/- |         | Mn +/-  |         | sda +/- |         | Mn +/-  |         | sda +/- |         |
|             |                                      |                                        | sda+    | sda-    | Mn+     | Mn-     | sda+    | sda-    | Mn+     | Mn-     | sda+    | sda-    | Mn+     | Mn-     |
| cheC        | CheY-P phosphatase                   | cheC                                   | [ 1.1 ] | [ 1.1 ] | [-1.4]  | [-1.5]  | [ 1.3 ] | [ 1.9 ] | [-1.4]  | [-1]    | -2      | -2.7 *  | [ 1.1 ] | [-1.2]  |
| cheD        | Chemoreceptor                        | glutamine deamidase                    | [-1.1]  | [-1.1]  | [-1.1]  | [-1.1]  | [ 1.1 ] | [ 1.2 ] | [ 1 ]   | [ 1.1 ] | -2.3 *  | -2.1 *  | [ 1.1 ] | [ 1.2 ] |
| sigD        | RNA polymerase                       | sigma-D factor                         | [ 1 ]   | [ 1.1 ] | [-1.1]  | [-1]    | [ 1.4 ] | [ 1.3 ] | [ 1 ]   | [-1.1]  | [-1.3]  | [-1.3]  | [ 1.1 ] | [ 1.1 ] |
| swrB (ylxL) | Swarming motility protein            | swrB                                   | [-1]    | [-1.2]  | [ 1.1 ] | [-1]    | [-1]    | [ 1 ]   | [-1]    | [ 1 ]   | [ 1.2 ] | 2 *     | -1.8    | [-1.1]  |
| <b>DnaA</b> | kdgRKAT                              | CcpA (-); DnaA (-); KdgR (-)           |         |         |         |         |         |         |         |         |         |         |         |         |
| kdgR        | HTH-type transcriptional regulator   |                                        | [-1]    | [-1]    | [-1]    | [ 1 ]   | [ 1.1 ] | [-1.1]  | [ 1.1 ] | [-1.1]  | [ 1.2 ] | [ 1.4 ] | [-1.2]  | [-1]    |
| kdgK        | 2-dehydro-3-deoxygluconokinase       |                                        | [-1]    | [ 1.1 ] | [-1.2]  | [-1]    | [-1.6]  | [-1.4]  | [-1]    | [ 1.1 ] | [-1.3]  | [-1.1]  | [-1]    | [ 1.1 ] |
| kdgA        | KHG/KDPG aldolase [Includes: 4-      |                                        | [ 1.2 ] | [ 1.3 ] | [-1.3]  | [-1.2]  | [ 1.2 ] | [ 1.2 ] | [-1.1]  | [-1.1]  | [ 1.3 ] | 2.1 *   | [-1.5]  | [ 1.1 ] |
| kdgT        | 2-keto-3-deoxygluconate permease     |                                        | [-1.1]  | [-1.1]  | [-1.1]  | [-1.1]  | [-1.3]  | [-1.1]  | [-1.3]  | [-1.1]  | [-1.1]  | [-1.2]  | [-1]    | [-1.1]  |
| <b>DnaA</b> | lytABC                               | DnaA (-); LytR (-); SigD (+); YvrH (-) |         |         |         |         |         |         |         |         |         |         |         |         |
| lytA        | Membrane-bound protein               | lytA                                   | [ 1 ]   | [-1.1]  | [ 1 ]   | [-1.1]  | [ 1.1 ] | [ 1.1 ] | [-1]    | [-1]    | [-1.3]  | -1.9 *  | 1.8     | [ 1.2 ] |
| lytB        | Amidase enhancer                     |                                        | [-1]    | [-1.4]  | [ 1.3 ] | [-1.1]  | [ 1 ]   | [-1]    | [ 1.1 ] | [ 1 ]   | -3 *    | -4.7 *  | [ 2 ]   | [ 1.3 ] |
| lytC        | N-acetylmuramoyl-L-alanine amidase   |                                        | [ 0 ]   | [ 0 ]   | [ 0 ]   | [ 0 ]   | [ 0 ]   | [ 0 ]   | [ 0 ]   | [ 0 ]   | [ 0 ]   | [ 0 ]   | [ 0 ]   | [ 0 ]   |
| <b>DnaA</b> | mraZ-mraW-ftsL-pbpB                  | DnaA (-) (Indirect?)                   |         |         |         |         |         |         |         |         |         |         |         |         |
| mraZ (ylIB) | Protein                              | mraZ                                   | [-1.5]  | [-1.2]  | [-1.2]  | [-1]    | [-1.2]  | [ 1.3 ] | [-1.6]  | [-1.1]  | 1.8     | [ 1.3 ] | [ 1.4 ] | [ 1.1 ] |
| mraW (ylxA) | S-adenosyl-L-methionine-dependent    |                                        | [-1.1]  | [-1.1]  | [ 1.1 ] | [ 1.1 ] | [-1.1]  | [-1]    | [-1.1]  | [-1]    | [ 1.3 ] | [ 1.2 ] | 1.5     | [ 1.4 ] |
| ftsL        | Cell division protein                | ftsL homolog                           | [-1]    | [-1]    | [-1.2]  | [-1.2]  | [ 1.1 ] | [ 1.4 ] | [-1.1]  | [ 1.2 ] | [ 1 ]   | [ 1 ]   | [ 1.3 ] | [ 1.4 ] |
| pbpB        | Penicillin-binding protein           | 2B                                     | [ 1.2 ] | [-1]    | [ 1.1 ] | [-1]    | [ 1.3 ] | 1.8 *   | [-1.3]  | [ 1.1 ] | [ 1.3 ] | [ 1.3 ] | [ 1.3 ] | [ 1.3 ] |
| <b>DnaA</b> | nrdIEF-ymaB                          | DnaA (+) (Indirect?); ResD (+)         |         |         |         |         |         |         |         |         |         |         |         |         |
| nrdI (ymaA) | Protein                              | nrdI                                   | [-1.1]  | [-1]    | [-1.2]  | [-1.1]  | [ 1.2 ] | [ 1.1 ] | [ 1.2 ] | [ 1.2 ] | -2.1 *  | -2.2 *  | [ 1.1 ] | [ 1 ]   |
| nrdE        | Ribonucleoside-diphosphate reductase |                                        | [ 1 ]   | [ 1.1 ] | [-1.2]  | [-1.1]  | [ 1.3 ] | [ 1.2 ] | [ 1 ]   | [ 1 ]   | -2 *    | -2.2 *  | [-1]    | [-1.1]  |
| nrdF        | Ribonucleoside-diphosphate reductase |                                        | [-1.1]  | [ 1.1 ] | [-1.1]  | [ 1.1 ] | [ 1.1 ] | [ 1.3 ] | [ 1.1 ] | [ 1.3 ] | [-1.4]  | [-1.4]  | [ 1.1 ] | [ 1.1 ] |
| ymaB        | Uncharacterized protein              | ymaB                                   | [-1]    | [ 1.1 ] | [-1.1]  | [-1]    | [ 1.3 ] | [-1.3]  | [ 1.2 ] | [-1.4]  | 2.6 *   | 1.8     | [ 1 ]   | [-1.5]  |

**Table S3.** Fold-differences in relative expression for genes in the DnaA regulon.

| Regulator   | Operon          | Regulation                                                    | Tm       |          |          |          | T0       |          |          |          | T3       |          |          |          |
|-------------|-----------------|---------------------------------------------------------------|----------|----------|----------|----------|----------|----------|----------|----------|----------|----------|----------|----------|
|             |                 |                                                               | Mn +/-   |          | sda +/-  |          | Mn +/-   |          | sda +/-  |          | Mn +/-   |          | sda +/-  |          |
|             |                 |                                                               | sda+     | sda-     | Mn+      | Mn-      | sda+     | sda-     | Mn+      | Mn-      | sda+     | sda-     | Mn+      | Mn-      |
| <b>DnaA</b> | pyrRPBCAAABKDFE | DnaA (-); PurR (-); PyrR (-); PyrR (-); PyrR (-)              |          |          |          |          |          |          |          |          |          |          |          |          |
|             | pyrR            | Bifunctional protein pyrR [Includes:                          | [ 1.1 ]  | [ 1.1 ]  | [ -1.2 ] | [ -1.1 ] | [ 1.2 ]  | [ 1.3 ]  | [ -1.1 ] | [ 1 ]    | [ 1 ]    | [ 1.3 ]  | [ -1.2 ] | [ 1.1 ]  |
|             | pyrP            | Uracil permease                                               | [ 1.2 ]  | [ 1.6 ]  | [ -1.4 ] | [ -1 ]   | [ 1 ]    | 1.7      | [ -1.3 ] | [ 1.2 ]  | [ 1.4 ]  | [ 1.3 ]  | [ 1.3 ]  | [ 1.1 ]  |
|             | pyrB            | Aspartate carbamoyltransferase                                | [ 1.1 ]  | [ 1.2 ]  | [ -1.1 ] | [ -1.1 ] | [ 1.1 ]  | [ 1.5 ]  | [ -1.3 ] | [ 1.1 ]  | [ -1.4 ] | [ -1.4 ] | [ 1.2 ]  | [ 1.2 ]  |
|             | pyrC            | Dihydroorotase                                                | [ 1.5 ]  | [ 1.4 ]  | [ 1.1 ]  | [ -1 ]   | [ 1.4 ]  | [ 1.7 ]  | [ 1.1 ]  | [ 1.3 ]  | [ -1.4 ] | [ -1.2 ] | [ 1.2 ]  | [ 1.4 ]  |
|             | pyrAA           | Carbamoyl-phosphate synthase                                  | [ 1.2 ]  | [ 1 ]    | [ 1.1 ]  | [ -1.1 ] | 1.8      | 2        | [ -1.1 ] | [ 1 ]    | -1.6     | [ -1.5 ] | [ 1.1 ]  | [ 1.2 ]  |
|             | pyrAB           | Carbamoyl-phosphate synthase                                  | [ 1.6 ]  | [ 1.7 ]  | [ -1.4 ] | [ -1.3 ] | [ 1.4 ]  | [ 1.5 ]  | [ -1 ]   | [ 1.1 ]  | [ -1.5 ] | [ -1.1 ] | [ 1 ]    | [ 1.4 ]  |
|             | pyrK            | Dihydroorotate dehydrogenase                                  | [ 1.2 ]  | [ 1.3 ]  | [ -1.1 ] | [ -1 ]   | [ 1.5 ]  | [ 1.4 ]  | [ 1.1 ]  | [ 1 ]    | [ -1.3 ] | [ -1.2 ] | [ 1.4 ]  | [ 1.4 ]  |
|             | pyrD            | Dihydroorotate dehydrogenase,                                 | [ 1.3 ]  | [ 1.2 ]  | [ 1.3 ]  | [ 1.2 ]  | [ 1.4 ]  | [ 1.5 ]  | [ 1.1 ]  | [ 1.3 ]  | [ -1.3 ] | [ -1.3 ] | [ 1.1 ]  | [ 1.1 ]  |
|             | pyrF            | Orotidine 5'-phosphate decarboxylase                          | [ -1 ]   | [ -1.1 ] | [ 1.1 ]  | [ 1 ]    | [ 1.1 ]  | [ -1 ]   | [ 1.3 ]  | [ 1.2 ]  | -2.1 *   | -1.9 *   | [ 1 ]    | [ 1.1 ]  |
|             | pyrE            | Orotate phosphoribosyltransferase                             | [ -1 ]   | [ 1.1 ]  | [ -1 ]   | [ 1.1 ]  | [ 1.1 ]  | [ 1.2 ]  | [ 1.1 ]  | [ 1.2 ]  | -2.2     | -2.1     | [ 1.1 ]  | [ 1.2 ]  |
| <b>DnaA</b> | rocABC          | AhrC (+); DnaA (+) (Indirect?); RocR (+); SigL (+)            |          |          |          |          |          |          |          |          |          |          |          |          |
|             | rocA            | 1-pyrroline-5-carboxylate                                     | [ -1.2 ] | [ -1.1 ] | [ -1.1 ] | [ 1 ]    | 2.8 *    | 3.3 *    | [ -1.3 ] | [ -1.1 ] | -4.3 *   | -4 *     | [ 1 ]    | [ 1.1 ]  |
|             | rocB            | Protein rocB                                                  | [ -1.1 ] | [ -1.2 ] | [ 1.1 ]  | [ -1 ]   | 2        | 2.3 *    | [ -1.2 ] | [ -1.1 ] | [ -1.3 ] | -2 *     | 1.8      | [ 1.1 ]  |
|             | rocC            | Amino-acid permease rocC                                      | [ 1.4 ]  | [ 1.1 ]  | [ 1.1 ]  | [ -1.2 ] | [ 1.2 ]  | 2.1 *    | [ -1.3 ] | [ 1.5 ]  | [ 1.2 ]  | [ -1.3 ] | [ 1.2 ]  | [ -1.3 ] |
| <b>DnaA</b> | rocDEF          | AhrC (+); DnaA (+) (Indirect?); RocR (+); SigL (+); Spo0A (-) |          |          |          |          |          |          |          |          |          |          |          |          |
|             | rocD            | Ornithine aminotransferase                                    | [ -1.2 ] | [ -1.1 ] | [ 1 ]    | [ 1.2 ]  | 2.8 *    | 2.3 *    | [ 1.3 ]  | [ 1.1 ]  | -2.9 *   | -2.4 *   | [ 1.6 ]  | 1.8      |
|             | rocE            | Amino-acid permease rocE                                      | [ -1.2 ] | [ 1 ]    | [ 1.6 ]  | [ 2 ]    | 4.4 *    | 3.4      | [ 1.1 ]  | [ -1.2 ] | -6.6 *   | -12.7 *  | [ 1.8 ]  | [ -1 ]   |
|             | rocF            | Arginase                                                      | [ -1 ]   | [ -1.2 ] | [ 1.4 ]  | [ 1.2 ]  | 4 *      | 2.7      | [ 1.2 ]  | [ -1.2 ] | -4.2 *   | -4.6 *   | [ 1.3 ]  | [ 1.2 ]  |
| <b>DnaA</b> | sda             | DnaA (+); LexA (-)                                            |          |          |          |          |          |          |          |          |          |          |          |          |
|             | sda             | Sporulation inhibitor sda                                     | [ -1.1 ] | [ -1.1 ] | [ 1.2 ]  | [ 1.2 ]  | [ -1.1 ] | -1.6     | [ 2 ]    | [ 1.3 ]  | [ -1.1 ] | [ -1 ]   | 2 *      | 2.1 *    |
| <b>DnaA</b> | soj-spo0J       | DnaA (-); Spo0A (-)                                           |          |          |          |          |          |          |          |          |          |          |          |          |
|             | soj             | Sporulation initiation inhibitor protein                      | [ 1 ]    | [ -1 ]   | [ -1 ]   | [ -1.1 ] | [ -1 ]   | [ -1.4 ] | [ 1.4 ]  | [ 1 ]    | [ -1.3 ] | [ -1 ]   | [ 1.1 ]  | [ 1.3 ]  |
|             | spo0J           | Stage 0 sporulation protein J                                 | [ 1.1 ]  | [ -1.1 ] | [ 1.1 ]  | [ -1 ]   | [ 1 ]    | [ -1.4 ] | [ 1.4 ]  | [ 1 ]    | 2.4 *    | 3.2 *    | -1.6     | [ -1.2 ] |
| <b>DnaA</b> | sunA            | DnaA (-) (Indirect?); Rok (-); YvrH (+)                       |          |          |          |          |          |          |          |          |          |          |          |          |
|             | sunA            | SPBc2 prophage-derived lantibiotic                            | [ -1.2 ] | [ -1.2 ] | [ 1.1 ]  | [ 1.1 ]  | [ -1.1 ] | [ -1.2 ] | [ 1.2 ]  | [ 1.2 ]  | [ 1.1 ]  | [ 1.3 ]  | [ 1.2 ]  | [ 1.4 ]  |



**Table S3.** Fold-differences in relative expression for genes in the DnaA regulon.

| Regulator   | Operon                                    | Regulation         | Tm       |          |          |          | T0       |          |          |          | T3       |          |          |          |
|-------------|-------------------------------------------|--------------------|----------|----------|----------|----------|----------|----------|----------|----------|----------|----------|----------|----------|
|             |                                           |                    | Mn +/-   |          | sda +/-  |          | Mn +/-   |          | sda +/-  |          | Mn +/-   |          | sda +/-  |          |
|             |                                           |                    | sda+     | sda-     | Mn+      | Mn-      | sda+     | sda-     | Mn+      | Mn-      | sda+     | sda-     | Mn+      | Mn-      |
| <b>DnaA</b> | thdF-gidAB-yyaA                           | ComK (+); DnaA (-) |          |          |          |          |          |          |          |          |          |          |          |          |
|             | mnmE (thdF) tRNA modification GTPase mnmE |                    | [ 1 ]    | [ 1.1 ]  | [ -1.1 ] | [ -1.1 ] | [ 1 ]    | [ -1 ]   | [ 1.1 ]  | [ 1.1 ]  | [ 1 ]    | [ 1 ]    | [ 1.4 ]  | [ 1.4 ]  |
|             | mnmG (gidA) tRNA uridine 5-               |                    | [ 1 ]    | [ -1.1 ] | [ 1 ]    | [ -1.1 ] | -1.8 *   | -1.6     | [ -1 ]   | [ 1 ]    | -1.6     | -1.5     | [ 1.3 ]  | [ 1.3 ]  |
|             | rsmG (gidB) Ribosomal RNA small subunit   |                    | [ 1.1 ]  | [ 1.2 ]  | [ -1.1 ] | [ 1.1 ]  | -1.8     | [ -1.6 ] | [ 1.1 ]  | [ 1.2 ]  | [ -1.4 ] | [ -1.2 ] | [ 1.1 ]  | [ 1.3 ]  |
|             | noc (yyaA) Nucleoid occlusion protein     |                    | [ 1.3 ]  | [ 1 ]    | [ 1 ]    | [ -1.2 ] | [ 1.2 ]  | [ 1.4 ]  | [ -1.1 ] | [ 1.1 ]  | [ 1.4 ]  | [ -1.2 ] | [ 1.5 ]  | [ -1.1 ] |
| <b>DnaA</b> | yclNOPQ                                   | DnaA (-); Fur (-)  |          |          |          |          |          |          |          |          |          |          |          |          |
|             | yclN Uncharacterized ABC transporter      |                    | [ -1 ]   | [ 1.2 ]  | [ -1.4 ] | [ -1.2 ] | [ -1.5 ] | [ -1.2 ] | [ -1.3 ] | [ -1 ]   | -1.6     | [ -1.2 ] | [ 1.6 ]  | 2        |
|             | yclO Uncharacterized ABC transporter      |                    | [ -1 ]   | [ 1.2 ]  | [ -1.8 ] | [ -1.5 ] | [ 1.1 ]  | [ 1.1 ]  | [ -1.2 ] | [ -1.1 ] | [ -1.3 ] | [ 1.3 ]  | [ 1.3 ]  | 2.1      |
|             | yclP Uncharacterized ABC transporter ATP- |                    | [ -1 ]   | [ -1.2 ] | [ -1.2 ] | [ -1.3 ] | [ -1.3 ] | [ -1.2 ] | [ -1 ]   | [ 1 ]    | [ -1.2 ] | [ -1.1 ] | [ 1.6 ]  | [ 1.7 ]  |
|             | yclQ Uncharacterized ABC transporter      |                    | [ -1 ]   | [ -1.2 ] | [ -1 ]   | [ -1.1 ] | [ -1.3 ] | [ -1.6 ] | [ 1.3 ]  | [ 1.1 ]  | [ -1.2 ] | [ 1 ]    | [ 1.8 ]  | 2.1      |
| <b>DnaA</b> | ykuNOP                                    | DnaA (-); Fur (-)  |          |          |          |          |          |          |          |          |          |          |          |          |
|             | ykuN Probable flavodoxin-1                |                    | [ -1.1 ] | [ -1.2 ] | [ 1 ]    | [ -1.1 ] | [ -1.8 ] | -1.9     | [ -1.1 ] | [ -1.2 ] | [ 1.5 ]  | [ 1.6 ]  | [ 1.4 ]  | [ 1.4 ]  |
|             | ykuO Uncharacterized protein ykuO         |                    | [ -1.3 ] | [ -1.8 ] | [ 1.2 ]  | [ -1.2 ] | [ -1.9 ] | -3.5 *   | [ 1.6 ]  | [ -1.1 ] | [ -1.3 ] | [ -1.1 ] | [ 1.2 ]  | [ 1.5 ]  |
|             | ykuP Probable flavodoxin-2                |                    | [ -1.3 ] | [ -1.3 ] | [ -1.3 ] | [ -1.3 ] | -2.5 *   | -2.2 *   | [ -1.1 ] | [ -1 ]   | [ -1.4 ] | [ 1.1 ]  | [ 1.1 ]  | [ 1.6 ]  |
| <b>DnaA</b> | ypvA                                      | DnaA (+)           |          |          |          |          |          |          |          |          |          |          |          |          |
|             | ypvA Probable ATP-dependent helicase      |                    | [ -1 ]   | [ 1.1 ]  | [ -1.1 ] | [ -1 ]   | [ -1 ]   | [ -1.1 ] | [ 1.1 ]  | [ 1.1 ]  | [ 1.1 ]  | 1.8 *    | -1.6     | [ -1 ]   |
| <b>DnaA</b> | yqeGH-aroD-yqel-nadD-yqeK                 | DnaA (-)           |          |          |          |          |          |          |          |          |          |          |          |          |
|             | yqeG Uncharacterized protein yqeG         |                    | [ 1.2 ]  | [ 1.2 ]  | [ -1.6 ] | [ -1.6 ] | [ 1.2 ]  | 2        | [ -2 ]   | [ -1.2 ] | [ -1.6 ] | -1.8     | [ -1 ]   | [ -1.1 ] |
|             | yqeH Uncharacterized protein yqeH         |                    | [ -1.1 ] | [ -1 ]   | [ -1.5 ] | [ -1.4 ] | [ 1.2 ]  | 2        | [ -2.2 ] | [ -1.3 ] | [ -1.7 ] | [ -1.4 ] | [ -1.2 ] | [ 1 ]    |
|             | aroD Shikimate dehydrogenase              |                    | [ -1.1 ] | [ -1 ]   | [ -1.3 ] | [ -1.2 ] | [ 1.3 ]  | [ 1.4 ]  | [ -1.3 ] | [ -1.3 ] | -1.9 *   | -1.8 *   | [ 1.1 ]  | [ 1.1 ]  |
|             | yqel Probable RNA-binding protein yqel    |                    | [ 1.1 ]  | [ 1.1 ]  | [ -1.3 ] | [ -1.4 ] | [ 1.1 ]  | [ 1.6 ]  | [ -1.3 ] | [ 1.1 ]  | [ -1.1 ] | [ 1.2 ]  | [ -1.1 ] | [ 1.1 ]  |
|             | nadD (yqeJ) Nicotinate-nucleotide         |                    | [ 1.1 ]  | [ 1 ]    | [ -1.1 ] | [ -1.2 ] | [ 1.3 ]  | [ 1.4 ]  | [ -1.3 ] | [ -1.2 ] | [ -1.3 ] | [ -1.1 ] | [ -1.1 ] | [ 1.1 ]  |
|             | yqeK Uncharacterized protein yqeK         |                    | [ 1 ]    | [ -1 ]   | [ -1.1 ] | [ -1.1 ] | [ 1.1 ]  | [ 1.2 ]  | [ -1.3 ] | [ -1.2 ] | [ -1.1 ] | 1.6      | [ -1.6 ] | [ 1.1 ]  |

**Table S3.** Fold-differences in relative expression for genes in the DnaA regulon.

| Regulator   | Operon                  | Regulation                            | Tm     |        |         |        | T0     |        |         |        | T3     |        |         |        |
|-------------|-------------------------|---------------------------------------|--------|--------|---------|--------|--------|--------|---------|--------|--------|--------|---------|--------|
|             |                         |                                       | Mn +/- |        | sda +/- |        | Mn +/- |        | sda +/- |        | Mn +/- |        | sda +/- |        |
|             |                         |                                       | sda+   | sda-   | Mn+     | Mn-    | sda+   | sda-   | Mn+     | Mn-    | sda+   | sda-   | Mn+     | Mn-    |
| <b>DnaA</b> | yurY-yurX-csd-nifU-yurU | DnaA (+)                              |        |        |         |        |        |        |         |        |        |        |         |        |
|             | sufC (yurY)             | sulfur mobilizing ABC protein, ATPase | [-1.5] | [-1.5] | [1.1]   | [1.1]  | -2.7 * | -3.1 * | [1.1]   | [-1.1] | -2 *   | -2.1 * | [1]     | [-1]   |
|             | sufD (yurX)             | FeS cluster assembly protein sufD     | [-1.6] | [-1.6] | [1.1]   | [1.1]  | -2     | -3.7 * | [1.4]   | [-1.3] | -3.2 * | -2.8 * | [-1.1]  | [1]    |
|             | csd                     | Probable cysteine desulfurase         | [-1.1] | [-1.5] | [1.2]   | [-1.1] | -1.9   | -2.6 * | [1.3]   | [-1]   | [-1.5] | [-1.3] | [-1.1]  | [1]    |
|             | nifU (yurV)             | NifU-like protein                     | [-1.7] | [-1.5] | [1.1]   | [1.3]  | -2.5 * | -4 *   | [1.2]   | [-1.3] | -2.7 * | -3.4 * | [1]     | [-1.2] |
|             | sufB (yurU)             | FeS cluster assembly protein sufB     | [-1.6] | [-1.6] | [1.4]   | [1.5]  | -2.4 * | -3 *   | [1.1]   | [-1.1] | -2.7 * | -3.4 * | [-1.1]  | [-1.4] |
| <b>DnaA</b> | yvdCD                   | DnaA (+) (Indirect?)                  |        |        |         |        |        |        |         |        |        |        |         |        |
|             | yvdC                    | Uncharacterized protein yvdC          | [1]    | [-1.1] | [-1]    | [-1.2] | [-1.2] | [-1.1] | [-1]    | [1]    | -1.6   | -1.7   | [1.4]   | [1.3]  |
|             | yvdD                    | UPF0717 protein yvdD                  | [-1]   | [-1]   | [-1]    | [-1]   | [-1]   | [-1.2] | [1.1]   | [-1]   | [-1.1] | [-1.1] | [1.2]   | [1.2]  |
| <b>DnaA</b> | ywIC                    | DnaA (-)                              |        |        |         |        |        |        |         |        |        |        |         |        |
|             | ywIC                    | Uncharacterized protein ywIC          | [-1.1] | [-1.2] | [1.1]   | [-1.1] | [-1]   | [-1.4] | [1.3]   | [-1.1] | [1.1]  | [1.4]  | [-1.1]  | [1.2]  |
| <b>DnaA</b> | ywzC-ywfO-ywgA          | DnaA (+)                              |        |        |         |        |        |        |         |        |        |        |         |        |
|             | ywzC                    | UPF0741 protein ywzC                  | [1.2]  | [1.2]  | [-1.1]  | [-1.1] | [1.2]  | [1.1]  | [1.2]   | [1.1]  | [1.1]  | [-1]   | [1.4]   | [1.2]  |
|             | ywfO                    | Uncharacterized protein ywfO          | [1.3]  | [1.4]  | [-1.2]  | [-1.1] | [-1]   | [-1.2] | [1]     | [-1.2] | -2     | -2 *   | [1.4]   | [1.4]  |
|             | ywgA                    | Uncharacterized protein ywgA          | [1.1]  | [1.2]  | [-1.2]  | [-1.1] | [1]    | [-1.3] | [1.4]   | [1]    | -2.7 * | -2.3 * | [1.2]   | [1.4]  |
| <b>DnaA</b> | yydA                    | DnaA (-) (weak)                       |        |        |         |        |        |        |         |        |        |        |         |        |
|             | rlmH (yydA)             | Ribosomal RNA large subunit           | [1]    | [-1]   | [1]     | [-1.1] | [1]    | [-1.1] | [1.2]   | [1]    | [1.2]  | 1.6 *  | [1.1]   | [1.5]  |

Numbers indicate fold-change (log10)

Brackets: Not significant;  $q > 0.05$  or fold-change  $< \log_2 0.6$  (= 1.5-fold)No brackets: Significant;  $q \leq 0.005$  (asterisk) or  $q \leq 0.05$  (no asterisk) and fold-change  $\geq \log_2(0.6)$  (= 1.5-fold)

**Hoover et al. (2010)**

**Table S4.** Fold-differences in relative expression for genes in the Fur regulon.

Numbers indicate fold-change (log10)

Brackets: Not significant;  $q > 0.05$  or fold-change  $< \log_2 0.6$  (= 1.5-fold)

No brackets: Significant;  $q \leq 0.005$  (asterisk) or  $q \leq 0.05$  (no asterisk) and fold-change  $\geq \log_2(0.6)$  (= 1.5-fold)

| Regulator - Operon - Regulation |             | Tm                                                                  |        |         |        | T0     |        |         |        | T3     |        |         |        |        |
|---------------------------------|-------------|---------------------------------------------------------------------|--------|---------|--------|--------|--------|---------|--------|--------|--------|---------|--------|--------|
|                                 |             | Mn +/-                                                              |        | sda +/- |        | Mn +/- |        | sda +/- |        | Mn +/- |        | sda +/- |        |        |
|                                 |             | sda+                                                                | sda-   | Mn+     | Mn-    | sda+   | sda-   | Mn+     | Mn-    | sda+   | sda-   | Mn+     | Mn-    |        |
| <b>Fur</b>                      | dhbACEBF    | DnaA (-) (Indirect?); Fur (-)                                       |        |         |        |        |        |         |        |        |        |         |        |        |
|                                 | dhbA        | 2,3-dihydro-2,3-dihydroxybenzoate                                   | [-1.2] | [-1.3]  | [1.1]  | [-1]   | -2 *   | -2.4 *  | [1.2]  | [-1]   | -2.5 * | -2.8 *  | 1.6    | [1.5]  |
|                                 | dhbC        | Isochorismate synthase dhbC                                         | [-1.1] | [-1.5]  | [1.2]  | [-1.2] | [-2.2] | -3.2    | [1.4]  | [-1.1] | [-1.2] | [1.1]   | [1.3]  | [1.8]  |
|                                 | dhbE        | 2,3-dihydroxybenzoate-AMP ligase                                    | [-1]   | [-1.5]  | [1.1]  | [-1.3] | -1.8   | -2.4 *  | [1.2]  | [-1.1] | [-1]   | [1.3]   | [-1.2] | [1.1]  |
|                                 | dhbB        | Isochorismatase                                                     | [-1]   | [-1.4]  | [1.1]  | [-1.2] | -2     | -2.6    | [1.2]  | [-1.1] | [1.1]  | [1.2]   | [1.1]  | [1.3]  |
|                                 | dhbF        | Dimodular nonribosomal peptide                                      | [-1.1] | [-1.3]  | [1.1]  | [-1.1] | [-1.4] | -1.9 *  | [1.3]  | [-1.1] | [-1.4] | [-1.4]  | [1.5]  | [1.4]  |
| <b>Fur</b>                      | feuABC-ybbA | Fur (-); YbbB (+)                                                   |        |         |        |        |        |         |        |        |        |         |        |        |
|                                 | feuA        | Iron-uptake system-binding protein                                  | [-1.3] | [-2.6]  | [1.1]  | [-1.8] | -3.3 * | -5 *    | [1.4]  | [-1.1] | [-1.7] | [-1.6]  | [1.3]  | [1.4]  |
|                                 | feuB        | Iron-uptake system permease protein                                 | [-1.5] | [-1.2]  | [-1.3] | [-1.1] | -2.3   | [-2]    | [-1.1] | [1]    | -2.1   | -2      | [1.1]  | [1.1]  |
|                                 | feuC        | Iron-uptake system permease protein                                 | [-1.2] | [-1.6]  | [-1.3] | [-1.7] | [-1.5] | [-1.5]  | [-1.1] | [-1.1] | [-1.5] | -3 *    | 2.1    | [1]    |
|                                 | ybbA        | Uncharacterized protein ybbA                                        | [-1.2] | [-1.7]  | [-1.2] | [-1.6] | [-1.9] | [-1.9]  | [-1.1] | [-1.1] | [1.2]  | 2.8 *   | -2.2   | [1.1]  |
| <b>Fur</b>                      | fhuD        | Fur (-)                                                             |        |         |        |        |        |         |        |        |        |         |        |        |
|                                 | fhuD        | Iron(3+)-hydroxamate-binding protein                                | [-1.1] | [-1.6]  | [1.2]  | [-1.2] | [-1.4] | -1.9    | [1.3]  | [-1]   | -1.8   | [1]     | [1.4]  | 2.6 *  |
| <b>Fur</b>                      | mrgC        | Fur (-)                                                             |        |         |        |        |        |         |        |        |        |         |        |        |
|                                 | yybR        | Uncharacterized HTH-type                                            | [1.1]  | [1]     | [1]    | [-1.1] | [-1.2] | [-1]    | [-1.2] | [1]    | [-1.1] | [-1.1]  | [-1.2] | [-1.2] |
| <b>Fur</b>                      | nasBCDEF    | ArfM (+); Fur (-); GlnR (-); ResD (+); TnrA (+); TnrA (+); YhdE (-) |        |         |        |        |        |         |        |        |        |         |        |        |
|                                 | nasB        | Assimilatory nitrate reductase electron                             | [1.2]  | [1.1]   | [-1]   | [-1.1] | [1.4]  | [1.4]   | [1]    | [-1]   | -1.5   | -1.6    | [1.3]  | [1.2]  |
|                                 | nasC        | Assimilatory nitrate reductase catalytic                            | [1.1]  | [-1.3]  | [1.1]  | [-1.2] | [1.2]  | [1]     | [1]    | [-1.1] | [-1.2] | [-1.3]  | [1.2]  | [1.1]  |
|                                 | nasD        | Nitrite reductase [NAD(P)H]                                         | [1]    | [-1]    | [1.3]  | [1.2]  | [1.8]  | [2.3]   | [-1]   | [1.2]  | [2.3]  | 3.7 *   | [2]    | 3.2    |
|                                 | nasE        | Assimilatory nitrite reductase [NAD(P)                              | [-1.1] | [1]     | [-1.2] | [-1.1] | [1.3]  | [1.3]   | [-1]   | [-1.1] | [-1.1] | [1.2]   | [1.1]  | [1.3]  |
|                                 | nasF        | Uroporphyrinogen-III C-                                             | [-1]   | [1.1]   | [-1.1] | [1.1]  | [1.5]  | 1.8 *   | [-1.2] | [1]    | [-1.2] | [-1]    | [-1.3] | [-1.1] |
| <b>Fur</b>                      | ybbB        | Fur (-)                                                             |        |         |        |        |        |         |        |        |        |         |        |        |
|                                 | ybbB        | Uncharacterized HTH-type                                            | [1]    | [-1.1]  | [1.3]  | [1.1]  | [1.1]  | [-1.1]  | [1.2]  | [-1]   | [-1.3] | [1.2]   | [-1.2] | [1.3]  |

**Table S4.** Fold-differences in relative expression for genes in the Fur regulon.

| Regulator  | Operon    | Regulation                            | Tm     |        |         |        | T0     |        |         |        | T3     |        |         |        |
|------------|-----------|---------------------------------------|--------|--------|---------|--------|--------|--------|---------|--------|--------|--------|---------|--------|
|            |           |                                       | Mn +/- |        | sda +/- |        | Mn +/- |        | sda +/- |        | Mn +/- |        | sda +/- |        |
|            |           |                                       | sda+   | sda-   | Mn+     | Mn-    | sda+   | sda-   | Mn+     | Mn-    | sda+   | sda-   | Mn+     | Mn-    |
| <b>Fur</b> | ycgT      | Fur (-)                               |        |        |         |        |        |        |         |        |        |        |         |        |
|            | ycgT      | Ferredoxin--NADP reductase 1          | [-1.2] | [-2]   | [1.2]   | [-1.4] | -1.7   | -2.2 * | [1.2]   | [1]    | -1.5   | [-1.2] | 1.7     | 2.1 *  |
| <b>Fur</b> | yclNOPQ   | DnaA (-); Fur (-)                     |        |        |         |        |        |        |         |        |        |        |         |        |
|            | yclN      | Uncharacterized ABC transporter       | [-1]   | [1.2]  | [-1.4]  | [-1.2] | [-1.5] | [-1.2] | [-1.3]  | [-1]   | -1.6   | [-1.2] | [1.6]   | 2      |
|            | yclO      | Uncharacterized ABC transporter       | [-1]   | [1.2]  | [-1.8]  | [-1.5] | [1.1]  | [1.1]  | [-1.2]  | [-1.1] | [-1.3] | [1.3]  | [1.3]   | 2.1    |
|            | yclP      | Uncharacterized ABC transporter ATP-  | [-1]   | [-1.2] | [-1.2]  | [-1.3] | [-1.3] | [-1.2] | [-1]    | [1]    | [-1.2] | [-1.1] | [1.6]   | [1.7]  |
|            | yclQ      | Uncharacterized ABC transporter       | [-1]   | [-1.2] | [-1]    | [-1.1] | [-1.3] | [-1.6] | [1.3]   | [1.1]  | [-1.2] | [1]    | [1.8]   | 2.1    |
| <b>Fur</b> | ydbN      | Fur (-)                               |        |        |         |        |        |        |         |        |        |        |         |        |
|            | ydbN      | Uncharacterized protein ydbN          | [-1.1] | [-1.5] | [1.1]   | [-1.2] | -3.3 * | -3.3 * | [1.2]   | [1.2]  | [1.6]  | [1.4]  | 2.2     | [2]    |
| <b>Fur</b> | ydhU      | Fur (-)                               |        |        |         |        |        |        |         |        |        |        |         |        |
|            |           |                                       | [1]    | [-1.1] | [1]     | [-1.1] | [1.1]  | [1.1]  | [-1]    | [-1.1] | [1.2]  | 2 *    | -1.7    | [1]    |
| <b>Fur</b> | yfhC      | Fur (-)                               |        |        |         |        |        |        |         |        |        |        |         |        |
|            | yfhC      | Putative NAD(P)H nitroreductase yfhC  | [-1.3] | [-1.6] | [1.1]   | [-1.1] | [-1.5] | [-2]   | [1.4]   | [1.1]  | [-1.1] | [-1.5] | [1.7]   | [1.3]  |
| <b>Fur</b> | yfiY      | Fur (-)                               |        |        |         |        |        |        |         |        |        |        |         |        |
|            | yfiY      | Probable siderophore-binding          | [-1.2] | [-1.2] | [1.1]   | [1.1]  | [-1.1] | [-1.6] | [1.5]   | [1]    | [-1.4] | [1.3]  | [1.7]   | 3.2    |
| <b>Fur</b> | yfiZ-yfhA | Fur (-)                               |        |        |         |        |        |        |         |        |        |        |         |        |
|            | yfiZ      | Probable siderophore transport system | [1]    | [-1.1] | [-1.1]  | [-1.2] | [-1.1] | [-1.1] | [1]     | [1]    | [-1.2] | [-1.4] | 1.8     | [1.5]  |
|            | yfhA      | Probable siderophore transport system | [-1.1] | [-1.1] | [1.1]   | [-1]   | [-1.1] | [-1.2] | [1.2]   | [1]    | [-1.1] | [1.2]  | [-1.1]  | [1.1]  |
| <b>Fur</b> | yfkM      | Fur (-)                               |        |        |         |        |        |        |         |        |        |        |         |        |
|            | yfkM      | General stress protein 18             | [1.1]  | [1]    | [1.4]   | [1.3]  | [-1]   | [1.2]  | [-1.6]  | [-1.4] | [1.2]  | [1.1]  | [-1.3]  | [-1.4] |
| <b>Fur</b> | yfmCDEF   | Fur (-)                               |        |        |         |        |        |        |         |        |        |        |         |        |
|            | yfmC      | Fe(3+)-citrate-binding protein yfmC   | [-1]   | [-1.2] | [-1.1]  | [-1.3] | [-1]   | [-1.5] | [1.3]   | [-1.2] | [-1.5] | [1.1]  | [1.4]   | 2.2    |
|            | yfmD      | Fe(3+)-citrate import system permease | [-1.3] | [-1.2] | [-1.3]  | [-1.3] | [-1.1] | [1.2]  | [-1.5]  | [-1.1] | [-1]   | [-1.1] | [-1.2]  | [-1.3] |
|            | yfmE      | Fe(3+)-citrate import system permease | [1.1]  | [1.2]  | [-1.2]  | [-1.1] | [1.1]  | [1.4]  | [1.1]   | [1.5]  | [1.1]  | [1.1]  | [1.3]   | [1.3]  |
|            | yfmF      | Fe(3+)-citrate import ATP-binding     | [1]    | [-1.2] | [-1.2]  | [-1.5] | 1.9 *  | [1.1]  | [1.8]   | [1]    | -3.3 * | -2.3 * | [-1]    | [1.4]  |

**Table S4.** Fold-differences in relative expression for genes in the Fur regulon.

| Regulator  | Operon      | Regulation                            | Tm     |        |         |        | T0     |        |         |        | T3     |        |         |       |
|------------|-------------|---------------------------------------|--------|--------|---------|--------|--------|--------|---------|--------|--------|--------|---------|-------|
|            |             |                                       | Mn +/- |        | sda +/- |        | Mn +/- |        | sda +/- |        | Mn +/- |        | sda +/- |       |
|            |             |                                       | sda+   | sda-   | Mn+     | Mn-    | sda+   | sda-   | Mn+     | Mn-    | sda+   | sda-   | Mn+     | Mn-   |
| <b>Fur</b> | yhfQ        | Fur (-)                               |        |        |         |        |        |        |         |        |        |        |         |       |
|            | yhfQ        | Putative ABC transporter substrate-   | [-1]   | [-1.1] | [-1.3]  | [-1.4] | [-1.2] | [-1.7] | [1.2]   | [-1.1] | [-1.5] | [1.1]  | [1.6]   | 2.5 * |
| <b>Fur</b> | ykuNOP      | DnaA (-); Fur (-)                     |        |        |         |        |        |        |         |        |        |        |         |       |
|            | ykuN        | Probable flavodoxin-1                 | [-1.1] | [-1.2] | [1]     | [-1.1] | [-1.8] | -1.9   | [-1.1]  | [-1.2] | [1.5]  | [1.6]  | [1.4]   | [1.4] |
|            | ykuO        | Uncharacterized protein ykuO          | [-1.3] | [-1.8] | [1.2]   | [-1.2] | [-1.9] | -3.5 * | [1.6]   | [-1.1] | [-1.3] | [-1.1] | [1.2]   | [1.5] |
|            | ykuP        | Probable flavodoxin-2                 | [-1.3] | [-1.3] | [-1.3]  | [-1.3] | -2.5 * | -2.2 * | [-1.1]  | [-1]   | [-1.4] | [1.1]  | [1.1]   | [1.6] |
| <b>Fur</b> | yoaJ        | Fur (-)                               |        |        |         |        |        |        |         |        |        |        |         |       |
|            | yoaJ        | Expansin-yoaJ                         | [1.1]  | [-1]   | [1]     | [-1.1] | [-1.3] | [-1.2] | [1.2]   | [1.3]  | [-1.1] | [1.3]  | [-1.1]  | [1.2] |
| <b>Fur</b> | yuil        | Fur (-)                               |        |        |         |        |        |        |         |        |        |        |         |       |
|            | besA (yuil) | Ferri-bacillibactin esterase besA     | [-1.7] | [-2.1] | [1.1]   | [-1.1] | -2.4   | -3.5 * | [1.3]   | [-1.1] | [-1.4] | [-1.4] | 2.2     | 2.3   |
| <b>Fur</b> | yusV        | Fur (-)                               |        |        |         |        |        |        |         |        |        |        |         |       |
|            | yusV        | Probable siderophore transport system | [-1.2] | [-1.5] | [1.1]   | [-1.1] | -2.4   | -2.6   | [1.2]   | [1.1]  | [1.3]  | [1.4]  | [1.3]   | [1.4] |
| <b>Fur</b> | ywbLMN      | Fur (-); SigW (+); SigX (+)           |        |        |         |        |        |        |         |        |        |        |         |       |
|            | ywbL        | Uncharacterized membrane protein      | [-1.3] | [-1.3] | [-1.3]  | [-1.2] | [-1.2] | [-1.4] | [1.5]   | [1.2]  | [-1.1] | [1]    | [1.8]   | 2.1   |
|            | ywbM        | UPF0409 protein ywbM                  | [-1.2] | [-1.4] | [-1.1]  | [-1.3] | [-1.4] | -2     | [1.5]   | [1]    | [-1.3] | [-1.4] | 2.5 *   | 2.4 * |
|            | ywbN        | Putative peroxidase ywbN              | [-1.3] | [-1.4] | [1]     | [-1]   | [-1.5] | -1.8   | [1.1]   | [-1.2] | [-1]   | [-1]   | [1.8]   | [1.8] |
| <b>Fur</b> | ywjA        | Fur (-)                               |        |        |         |        |        |        |         |        |        |        |         |       |
|            | ywjA        | Uncharacterized ABC transporter ATP-  | [-1]   | [-1.1] | [1]     | [-1.1] | [-1.1] | [-1.1] | [-1.1]  | [-1.1] | [1.1]  | [-1.2] | [1.6]   | [1.1] |
| <b>Fur</b> | yxeB        | Fur (-)                               |        |        |         |        |        |        |         |        |        |        |         |       |
|            | yxeB        | Iron(3+)-hydroxamate-binding protein  | [-1.8] | [-1.9] | [1.1]   | [1.1]  | [-1.6] | -2.7   | [1.9]   | [1.2]  | -2.3   | [-1]   | [2]     | 4.5 * |

Numbers indicate fold-change (log10)

Brackets: Not significant;  $q > 0.05$  or fold-change  $< \log_2 0.6$  (= 1.5-fold)

No brackets: Significant;  $q \leq 0.005$  (asterisk) or  $q \leq 0.05$  (no asterisk) and fold-change  $\geq \log_2(0.6)$  (= 1.5-fold)

**Hoover et al. (2010)**

**Table S5.** Operons with genes that are significantly repressed ( $q \leq 0.005$ ) at T3 in an *sda*-dependent manner in the absence of Mn(II).

Numbers indicate fold-change (log10)

Brackets: Not significant;  $q > 0.05$  or fold-change  $< \log_2 0.6$  (= 1.5-fold)

No brackets: Significant;  $q \leq 0.005$  (asterisk) or  $q \leq 0.05$  (no asterisk) and fold-change  $\geq \log_2(0.6)$  (= 1.5-fold)

| Regulator - Operon - Regulation |             |                                                 | Tm     |        |         |        | T0     |        |         |        | T3     |        |         |        |
|---------------------------------|-------------|-------------------------------------------------|--------|--------|---------|--------|--------|--------|---------|--------|--------|--------|---------|--------|
|                                 |             |                                                 | Mn +/- |        | sda +/- |        | Mn +/- |        | sda +/- |        | Mn +/- |        | sda +/- |        |
|                                 |             |                                                 | sda+   | sda-   | Mn+     | Mn-    | sda+   | sda-   | Mn+     | Mn-    | sda+   | sda-   | Mn+     | Mn-    |
| <b>AbrB</b>                     | aprE        | AbrB (-); DegU (+); Hpr (-); SinR (-); TenA (+) |        |        |         |        |        |        |         |        |        |        |         |        |
|                                 | aprE        | Subtilisin E                                    | [-1.1] | [-1.2] | [1.4]   | [1.2]  | [1]    | [-1.2] | [1]     | [-1.2] | 2.2 *  | -1.7   | [1.5]   | -2.5 * |
| <b>AbrB</b>                     | skf         | AbrB (-); PhoP (+); Spo0A (+)                   |        |        |         |        |        |        |         |        |        |        |         |        |
|                                 | skfA (ybcO) | Sporulation-killing factor skfA                 | [-1]   | [-1.2] | [1.4]   | [1.2]  | [1.1]  | [-1.2] | [1.2]   | [-1.1] | [1.8]  | 2.5    | [-1.9]  | [-1.3] |
|                                 | skfB (ybcP) | Uncharacterized protein skfB                    | [-1.1] | [-1.1] | [1.1]   | [1]    | [-1.3] | [-1.1] | [-1.1]  | [1.1]  | 1.9 *  | [-1.2] | [1.3]   | -1.7   |
|                                 | skfC (ybcS) | Sporulation-killing factor biosynthesis         | [1]    | [-1.1] | [-1.1]  | [-1.2] | [1.3]  | [1.4]  | [-1.4]  | [-1.3] | 3.9 *  | [1.4]  | [1]     | -2.7 * |
|                                 | skfC (ybcS) | Sporulation-killing factor biosynthesis         | [-1.1] | [-1.1] | [1]     | [-1]   | [-1.1] | [-1.1] | [1]     | [-1]   | 2.1 *  | [-1.3] | 1.7 *   | -1.6   |
|                                 | skfE (ybdA) | SkfA peptide export ATP-binding                 | [-1]   | [-1]   | [1.2]   | [1.2]  | [-1.1] | [1.3]  | [-1.9]  | [-1.3] | 5.6 *  | [-1]   | [1.7]   | -3.3 * |
|                                 | skfF (ybdB) | Putative bacteriocin-skfA transport             | [-1]   | [1.3]  | [-1.2]  | [1.1]  | [1.1]  | [1.4]  | [-1.2]  | [1.1]  | 2.5 *  | [-1.3] | [1.1]   | -2.9 * |
|                                 | skfG (ybdD) | Uncharacterized protein skfG                    | [1]    | [-1]   | [1.1]   | [1]    | [-1.1] | [-1.2] | [-1.3]  | [-1.3] | [1.2]  | [-1.4] | [1.3]   | [-1.3] |
|                                 | skfH (ybdE) | Thioredoxin-like protein skfH                   | [-1.4] | [-1.2] | [1.1]   | [1.2]  | -1.6   | [-1.3] | [-1.4]  | [-1.1] | 3.2 *  | [-1.2] | [1.1]   | -3.4 * |
| <b>DegU</b>                     | aprE        | AbrB (-); DegU (+); Hpr (-); SinR (-); TenA (+) |        |        |         |        |        |        |         |        |        |        |         |        |
|                                 | aprE        | Subtilisin E                                    | [-1.1] | [-1.2] | [1.4]   | [1.2]  | [1]    | [-1.2] | [1]     | [-1.2] | 2.2 *  | -1.7   | [1.5]   | -2.5 * |
| <b>GerE</b>                     | gerPABCDEF  | GerE (-); SigK (+)                              |        |        |         |        |        |        |         |        |        |        |         |        |
|                                 | gerPA       | Probable spore germination protein              | [-1]   | [-1.2] | [1.1]   | [-1.1] | -3.1 * | -3.9 * | [1.1]   | [-1.1] | 3.4 *  | 3.1 *  | -1.7    | -1.9 * |
|                                 | gerPB       | Probable spore germination protein              | [1.2]  | [-1.1] | [-1.1]  | [-1.4] | [1.1]  | [-1]   | [-1.1]  | [-1.2] | [1.1]  | [1.3]  | [-1.2]  | [-1]   |
|                                 | gerPC       | Probable spore germination protein              | [1.5]  | [-1.1] | [1.3]   | [-1.3] | [1.3]  | [-1]   | [1.1]   | [-1.2] | 3.5 *  | [1.4]  | [-1.1]  | -2.7 * |
|                                 | gerPD       | Probable spore germination protein              | [-1.2] | [-1]   | [-1.2]  | [1]    | -3.6 * | -3.9 * | [-1.1]  | [-1.2] | 1.6    | [1.5]  | [-1.4]  | [-1.5] |
|                                 | gerPE       | Probable spore germination protein              | [1.1]  | [1.1]  | [1.2]   | [1.2]  | [1.2]  | [-1.1] | [1.2]   | [-1.2] | 8.2 *  | 3.5 *  | [-1.2]  | -2.8 * |
|                                 | gerPF       | Probable spore germination protein              | [1.2]  | [1]    | [1.3]   | [1.1]  | [1]    | [-1]   | [-1.2]  | [-1.3] | [1.4]  | [-1.1] | [-1.1]  | [-1.7] |
| <b>Hpr</b>                      | aprE        | AbrB (-); DegU (+); Hpr (-); SinR (-); TenA (+) |        |        |         |        |        |        |         |        |        |        |         |        |
|                                 | aprE        | Subtilisin E                                    | [-1.1] | [-1.2] | [1.4]   | [1.2]  | [1]    | [-1.2] | [1]     | [-1.2] | 2.2 *  | -1.7   | [1.5]   | -2.5 * |

**Table S5.** Operons with genes that are significantly repressed ( $q \leq 0.005$ ) at T3 in an *sda*-dependent manner in the absence of Mn(II).

| Regulator   | Operon                      | Regulation                                         | Tm     |        |         |        | T0     |        |         |        | T3     |        |         |        |
|-------------|-----------------------------|----------------------------------------------------|--------|--------|---------|--------|--------|--------|---------|--------|--------|--------|---------|--------|
|             |                             |                                                    | Mn +/- |        | sda +/- |        | Mn +/- |        | sda +/- |        | Mn +/- |        | sda +/- |        |
|             |                             |                                                    | sda+   | sda-   | Mn+     | Mn-    | sda+   | sda-   | Mn+     | Mn-    | sda+   | sda-   | Mn+     | Mn-    |
| <b>PhoP</b> | <i>ski</i>                  | AbrB (-); PhoP (+); Spo0A (+)                      |        |        |         |        |        |        |         |        |        |        |         |        |
|             | <i>skfA</i> ( <i>ybcO</i> ) | Sporulation-killing factor <i>skfA</i>             | [-1]   | [-1.2] | [1.4]   | [1.2]  | [1.1]  | [-1.2] | [1.2]   | [-1.1] | [1.8]  | 2.5    | [-1.9]  | [-1.3] |
|             | <i>skfB</i> ( <i>ybcP</i> ) | Uncharacterized protein <i>skfB</i>                | [-1.1] | [-1.1] | [1.1]   | [1]    | [-1.3] | [-1.1] | [-1.1]  | [1.1]  | 1.9 *  | [-1.2] | [1.3]   | -1.7   |
|             | <i>skfC</i> ( <i>ybcS</i> ) | Sporulation-killing factor biosynthesis            | [1]    | [-1.1] | [-1.1]  | [-1.2] | [1.3]  | [1.4]  | [-1.4]  | [-1.3] | 3.9 *  | [1.4]  | [1]     | -2.7 * |
|             | <i>skfC</i> ( <i>ybcS</i> ) | Sporulation-killing factor biosynthesis            | [-1.1] | [-1.1] | [1]     | [-1]   | [-1.1] | [-1.1] | [1]     | [-1]   | 2.1 *  | [-1.3] | 1.7 *   | -1.6   |
|             | <i>skfE</i> ( <i>ybdA</i> ) | <i>SkfA</i> peptide export ATP-binding             | [-1]   | [-1]   | [1.2]   | [1.2]  | [-1.1] | [1.3]  | [-1.9]  | [-1.3] | 5.6 *  | [-1]   | [1.7]   | -3.3 * |
|             | <i>skfF</i> ( <i>ybdB</i> ) | Putative bacteriocin- <i>skfA</i> transport        | [-1]   | [1.3]  | [-1.2]  | [1.1]  | [1.1]  | [1.4]  | [-1.2]  | [1.1]  | 2.5 *  | [-1.3] | [1.1]   | -2.9 * |
|             | <i>skfG</i> ( <i>ybdD</i> ) | Uncharacterized protein <i>skfG</i>                | [1]    | [-1]   | [1.1]   | [1]    | [-1.1] | [-1.2] | [-1.3]  | [-1.3] | [1.2]  | [-1.4] | [1.3]   | [-1.3] |
|             | <i>skfH</i> ( <i>ybdE</i> ) | Thioredoxin-like protein <i>skfH</i>               | [-1.4] | [-1.2] | [1.1]   | [1.2]  | -1.6   | [-1.3] | [-1.4]  | [-1.1] | 3.2 *  | [-1.2] | [1.1]   | -3.4 * |
| <b>PhoP</b> | <i>ykbZ-ykoL</i>            | PhoP (+); TnrA (+)                                 |        |        |         |        |        |        |         |        |        |        |         |        |
|             | <i>ykbZ</i>                 | Uncharacterized protein <i>ykbZ</i>                | [1]    | [1.2]  | [-1.3]  | [-1.2] | [1.3]  | 1.7    | [-1.3]  | [-1]   | 4.3 *  | 4 *    | -1.8    | -1.9 * |
|             | <i>ykoL</i>                 | Stress response protein <i>ykoL</i>                | [-1]   | [-1]   | [-1.1]  | [-1]   | [1.2]  | [1.1]  | [-1.1]  | [-1.2] | 2.3 *  | 1.9 *  | [-1]    | [-1.2] |
| <b>PhoP</b> | <i>yttP</i>                 | PhoP (+); Spo0A (+)                                |        |        |         |        |        |        |         |        |        |        |         |        |
|             | <i>yttP</i>                 | Probable HTH-type transcriptional                  | [-1.2] | [-1.2] | [1.1]   | [1.1]  | [-1.1] | [-1.4] | [1.3]   | [1]    | 6.4 *  | 1.9    | [1]     | -3.2 * |
| <b>RsfA</b> | <i>rsfA</i>                 | RsfA (-); SigF (+); SigG (+)                       |        |        |         |        |        |        |         |        |        |        |         |        |
|             | <i>rsfA</i>                 | Prespore-specific transcriptional                  | [-1.2] | [-1.2] | [1.6]   | [1.6]  | [-1.8] | -2.2   | [1.3]   | [1.1]  | 10.7 * | 5.2 *  | -1.9    | -3.8 * |
| <b>RsfA</b> | <i>spolIGA-sigE-sigG</i>    | RsfA (+); SigF (+); SigG (+); Spo0A (+); SpoVT (-) |        |        |         |        |        |        |         |        |        |        |         |        |
|             | <i>spolIGA</i>              | Sporulation sigma-E factor-processing              | [1.1]  | [-1.2] | [1.4]   | [1.1]  | [1.2]  | [-1.2] | [1.4]   | [-1.1] | 3.7 *  | 2.3 *  | -1.9    | -2.9 * |
|             | <i>sigE</i>                 | RNA polymerase sigma-E factor                      | [1.1]  | [1.2]  | [-1]    | [1.1]  | [1]    | [1.2]  | [-1.1]  | [1.1]  | [1.5]  | [1.4]  | -1.5    | -1.6   |
|             | <i>sigG</i>                 | RNA polymerase sigma-G factor                      | [1.2]  | [1.5]  | [1.2]   | [1.5]  | [1.4]  | [1.4]  | [-1]    | [-1]   | 6.1 *  | 2.4 *  | -2.4 *  | -5.9 * |
| <b>RsfA</b> | <i>spolIR</i>               | RsfA (-); SigF (+)                                 |        |        |         |        |        |        |         |        |        |        |         |        |
|             | <i>spolIR</i>               | Stage II sporulation protein R                     | [-1.1] | [1]    | [-1.2]  | [-1.1] | [1]    | [-1.2] | [1.2]   | [-1.1] | 8.2 *  | 3.3 *  | [-1.5]  | -3.6 * |
| <b>SigE</b> | <i>dacB-spmAB</i>           | SigE (+)                                           |        |        |         |        |        |        |         |        |        |        |         |        |
|             | <i>dacB</i>                 | D-alanyl-D-alanine carboxypeptidase                | [1]    | [-1]   | [1.1]   | [-1]   | [1.1]  | [-1]   | [1.3]   | [1.1]  | 4.2 *  | 4.4 *  | [-1.7]  | [-1.6] |
|             | <i>spmA</i>                 | Spore maturation protein A                         | [-1.1] | [-1]   | [1.2]   | [1.2]  | [-1.2] | -1.6   | [1.3]   | [-1]   | 7.1 *  | 5.7 *  | -1.8    | -2.3 * |
|             | <i>spmB</i>                 | Spore maturation protein B                         | [1.2]  | [-1]   | [1.2]   | [-1]   | [-1.2] | [-1.3] | [1.1]   | [-1]   | 4.1 *  | 3.2 *  | [-1.5]  | -1.8   |

**Table S5.** Operons with genes that are significantly repressed ( $q \leq 0.005$ ) at T3 in an *sda*-dependent manner in the absence of Mn(II).

| Regulator   | Operon      | Regulation                         | Tm      |         |         |         | T0      |         |         |         | T3      |       |         |        |
|-------------|-------------|------------------------------------|---------|---------|---------|---------|---------|---------|---------|---------|---------|-------|---------|--------|
|             |             |                                    | Mn +/-  |         | sda +/- |         | Mn +/-  |         | sda +/- |         | Mn +/-  |       | sda +/- |        |
|             |             |                                    | sda+    | sda-    | Mn+     | Mn-     | sda+    | sda-    | Mn+     | Mn-     | sda+    | sda-  | Mn+     | Mn-    |
| <b>SigE</b> | gerR        | SigE (+)                           |         |         |         |         |         |         |         |         |         |       |         |        |
|             | ylbO        | Uncharacterized protein ylbO       | [ 1.2 ] | [ 1.1 ] | [ 1.6 ] | [ 1.4 ] | [ 1.6 ] | [ 1.5 ] | [ 1.1 ] | [ 1 ]   | 12.1 *  | 8.8 * | -2.5    | -3.5 * |
| <b>SigE</b> | glgBCDAP    | SigE (+)                           |         |         |         |         |         |         |         |         |         |       |         |        |
|             | glgB        | 1,4-alpha-glucan-branching enzyme  | [-1.1]  | [ 1 ]   | [ 1.4 ] | [ 1.5 ] | [-1]    | [-1.1]  | [-1.2]  | [-1.3]  | 4.7 *   | 2.6 * | -2.3    | -4.1 * |
|             | glgC        | Glucose-1-phosphate                | [-1.1]  | [ 1 ]   | [ 1.1 ] | [ 1.3 ] | [-1.3]  | [-1.5]  | [ 1.2 ] | [ 1 ]   | 4.9 *   | 5 *   | -2      | [-2]   |
|             | glgD        | Glycogen biosynthesis protein glgD | [-1.4]  | [-1]    | [-1.3]  | [ 1 ]   | -3.1 *  | -3.5 *  | [ 1.1 ] | [-1]    | 3.2 *   | 2.3 * | -2      | -2.7   |
|             | glgA        | Glycogen synthase                  | [-1.2]  | [-1.5]  | [ 1.4 ] | [ 1.1 ] | -3.2 *  | -3.6 *  | [ 1.2 ] | [ 1.1 ] | 6.9 *   | 3.9 * | -2.1    | -3.8 * |
|             | glgP        | Glycogen phosphorylase             | [-1]    | [-1]    | [ 1.1 ] | [ 1.1 ] | -1.7    | -1.9    | [ 1.3 ] | [ 1.2 ] | 6.8 *   | 3.2 * | [-1.6]  | -3.4 * |
| <b>SigE</b> | safA-coxA   | SigE (+)                           |         |         |         |         |         |         |         |         |         |       |         |        |
|             | safA        | SpoIVD-associated factor A         | [ 1 ]   | [-1.3]  | [ 2.3 ] | [ 1.7 ] | [ 1.3 ] | [-1.4]  | [ 1.6 ] | [-1.1]  | 13.2 *  | 7 *   | [-1.9]  | -3.5 * |
|             | coxA        | Sporulation cortex protein coxA    | [ 1 ]   | [-1.1]  | [ 1.2 ] | [ 1.1 ] | [-1.2]  | [ 1 ]   | [ 1.2 ] | [ 1.4 ] | [ 1.1 ] | 2.6 * | -2.6 *  | [-1.1] |
| <b>SigE</b> | spoIVA      | SigE (+); SpoIIID (-)              |         |         |         |         |         |         |         |         |         |       |         |        |
|             | spoIVA      | Stage IV sporulation protein A     | [-1.1]  | [-1.1]  | [ 1.3 ] | [ 1.3 ] | [-1.1]  | [-1.4]  | [ 1.2 ] | [-1]    | 18.5 *  | 4.3 * | [-1]    | -4.4 * |
| <b>SigE</b> | spoIVFAB    | SigE (+); SpoIIID (-)              |         |         |         |         |         |         |         |         |         |       |         |        |
|             | spoIVFA     | Stage IV sporulation protein FA    | [ 1 ]   | [-1.1]  | [ 1.4 ] | [ 1.2 ] | [-1]    | [-1.1]  | [ 1.1 ] | [ 1 ]   | 9 *     | 4.8 * | -1.6    | -3 *   |
|             | spoIVFB     | Stage IV sporulation protein FB    | [-1.1]  | [-1.1]  | [-1.1]  | [-1]    | -2.2 *  | -2.2 *  | [-1.2]  | [-1.2]  | 2.5 *   | 2.8 * | [-1.5]  | [-1.4] |
| <b>SigE</b> | spoVID-ysxE | SigE (+)                           |         |         |         |         |         |         |         |         |         |       |         |        |
|             | spoVID      | Stage VI sporulation protein D     | [-1.5]  | [-1.6]  | [ 1.2 ] | [ 1.2 ] | -2.2    | -2.3    | [ 1.3 ] | [ 1.2 ] | 20.6 *  | 7.8 * | [-1.5]  | -3.9 * |
|             | ysxE        | Uncharacterized protein ysxE       | [-1.2]  | [ 1 ]   | [ 1.8 ] | [ 2.1 ] | [-1.1]  | [-1.1]  | [ 1.5 ] | [ 1.4 ] | 12.5 *  | 9.5 * | -2.5    | -3.3   |
| <b>SigE</b> | spoVR       | SigE (+)                           |         |         |         |         |         |         |         |         |         |       |         |        |
|             | spoVR       | Stage V sporulation protein R      | [ 1.2 ] | [ 1.1 ] | [ 1.7 ] | [ 1.6 ] | [ 1.3 ] | [ 1.1 ] | [ 1.1 ] | [-1.1]  | 9.7 *   | 7.3 * | -2.3    | -3 *   |
| <b>SigE</b> | ydcC        | SigE (+)                           |         |         |         |         |         |         |         |         |         |       |         |        |
|             | ydcC        | Sporulation protein ydcC           | [-1.2]  | [-1.2]  | [ 1.7 ] | [ 1.7 ] | [ 1.1 ] | [-1.2]  | [ 1.5 ] | [ 1.1 ] | 12.6 *  | 8.3 * | -1.9    | -2.9 * |
| <b>SigE</b> | ydhD        | SigE (+)                           |         |         |         |         |         |         |         |         |         |       |         |        |
|             | ydhD        | Putative sporulation-specific      | [ 1 ]   | [ 1 ]   | [ 1.1 ] | [ 1.1 ] | [ 1.1 ] | [-1.3]  | [ 1.4 ] | [-1]    | 8 *     | 6.2 * | -1.6    | -2.1 * |



**Table S5.** Operons with genes that are significantly repressed ( $q \leq 0.005$ ) at T3 in an *sda*-dependent manner in the absence of Mn(II).

| Regulator   | Operon               | Regulation                                             | Tm      |         |         |         | T0      |         |         |         | T3      |       |         |         |
|-------------|----------------------|--------------------------------------------------------|---------|---------|---------|---------|---------|---------|---------|---------|---------|-------|---------|---------|
|             |                      |                                                        | Mn +/-  |         | sda +/- |         | Mn +/-  |         | sda +/- |         | Mn +/-  |       | sda +/- |         |
|             |                      |                                                        | sda+    | sda-    | Mn+     | Mn-     | sda+    | sda-    | Mn+     | Mn-     | sda+    | sda-  | Mn+     | Mn-     |
| <b>SigE</b> | yhaX                 | SigE (+)                                               |         |         |         |         |         |         |         |         |         |       |         |         |
|             | yhaX                 | Stress response protein yhaX                           | [ 1 ]   | [-1.1]  | [ 1.2 ] | [ 1.1 ] | [-1]    | [-1.1]  | [ 1.4 ] | [ 1.3 ] | 5.3 *   | 5.4 * | -2.7 *  | -2.7 *  |
| <b>SigE</b> | yjbX                 | SigE (+)                                               |         |         |         |         |         |         |         |         |         |       |         |         |
|             | cotO (yjbX)          | Spore coat protein O                                   | [-1]    | [-1.1]  | [ 1.8 ] | [ 1.6 ] | [ 1 ]   | [-1.4]  | [ 1.9 ] | [ 1.4 ] | 14.8 *  | 7.1 * | [-1.9]  | -4 *    |
| <b>SigE</b> | ykvUV                | SigE (+); SigG (+); SpoIIID (-)                        |         |         |         |         |         |         |         |         |         |       |         |         |
|             | ykvU                 | Sporulation protein ykvU                               | [ 1.1 ] | [-1]    | [ 1.3 ] | [ 1.2 ] | [ 1.1 ] | [ 1.2 ] | [ 1.1 ] | [ 1.2 ] | 4.7 *   | 3.9 * | -2      | -2.4 *  |
|             | stoA (ykvV)          | Sporulation thiol-disulfide                            | [-1]    | [-1.1]  | [ 1.3 ] | [ 1.1 ] | [ 1.5 ] | [ 1.2 ] | [ 1.3 ] | [ 1 ]   | 1.7     | 2.8 * | -2 *    | [-1.2]  |
| <b>SigE</b> | yngJIHGFE            | SigE (+)                                               |         |         |         |         |         |         |         |         |         |       |         |         |
|             | yngJ                 | Probable acyl-CoA dehydrogenase                        | [ 1.1 ] | [-1]    | [ 1.4 ] | [ 1.3 ] | [ 1.2 ] | [-1.1]  | [ 1.7 ] | [ 1.3 ] | 6.9 *   | 6.9 * | -3.2 *  | -3.1 *  |
|             | yngI                 | Putative acyl-CoA synthetase yngI                      | [ 1.2 ] | [ 1.3 ] | [ 1.2 ] | [ 1.3 ] | 3       | 2.7     | [-1.1]  | [-1.1]  | [ 1.3 ] | 2.1   | [-2]    | [-1.2]  |
|             | accC2 (yngH)         | Biotin carboxylase 2                                   | [-1]    | [-1]    | [ 1 ]   | [ 1 ]   | [-1.2]  | [-1.2]  | [ 1.1 ] | [ 1.1 ] | [ 1.1 ] | 2.2 * | -1.8    | [ 1.1 ] |
|             | yngG                 | Hydroxymethylglutaryl-CoA lyase yngG                   | [-1.2]  | [-1.1]  | [ 1.1 ] | [ 1.1 ] | [ 1 ]   | [-1.1]  | [ 1.1 ] | [-1]    | 1.8     | 4.5 * | -3.4 *  | [-1.4]  |
|             | yngF                 | Putative enoyl-CoA                                     | [ 1.1 ] | [-1.2]  | [ 1.4 ] | [ 1.1 ] | [ 1 ]   | [ 1 ]   | [ 1.1 ] | [ 1.1 ] | 2.8 *   | 5.8 * | -4.1 *  | -2      |
|             | yngE                 | Uncharacterized carboxylase yngE                       | [ 1 ]   | [-1.2]  | [ 1.5 ] | [ 1.3 ] | [-1.5]  | -1.9    | [ 1.6 ] | [ 1.3 ] | 4.9 *   | 5.1 * | -2.7 *  | -2.5 *  |
| <b>SigE</b> | yqhV-spoIIIAABCDEFGH | SigE (+); SigE (+); SpoIIID (-); SpoIIID (-); YlbO (-) |         |         |         |         |         |         |         |         |         |       |         |         |
|             | yqhV                 | Uncharacterized protein yqhV                           | [-1]    | [-1.1]  | [ 1 ]   | [ 1 ]   | [ 1 ]   | [-1.1]  | [ 1.2 ] | [ 1.1 ] | 1.7     | 2.3 * | [-1.6]  | [-1.2]  |
|             | spoIIIAA             | Stage III sporulation protein AA                       | [ 1 ]   | [-1.1]  | [ 1.3 ] | [ 1.2 ] | [-1.1]  | [-1.3]  | [ 1.2 ] | [-1]    | 8.3 *   | 5.1 * | [-1.5]  | -2.3 *  |
|             | spoIIAB              | Stage III sporulation protein AB                       | [ 1.2 ] | [-1]    | [ 1.2 ] | [ 1 ]   | [ 1.4 ] | [ 1.2 ] | [ 1.1 ] | [ 1 ]   | 7.3 *   | 5.5 * | [-1.7]  | -2.3    |
|             | spoIIAC              | Stage III sporulation protein AC                       | [-1.2]  | [-1]    | [ 1.1 ] | [ 1.2 ] | -4.9 *  | -5 *    | [ 1 ]   | [ 1 ]   | 4.4 *   | 4.2 * | [-1.5]  | [-1.6]  |
|             | spoIIAD              | Stage III sporulation protein AD                       | [ 1.3 ] | [-1.1]  | [ 1.5 ] | [ 1.1 ] | [-1]    | [-1.1]  | [ 1.1 ] | [ 1.1 ] | 8.2 *   | 4.8 * | [-1.5]  | -2.6 *  |
|             | spoIIAE              | Stage III sporulation protein AE                       | [ 1 ]   | [ 1 ]   | [ 1.1 ] | [ 1.1 ] | [-1.2]  | [-1.2]  | [ 1.2 ] | [ 1.2 ] | 6.8 *   | 6.3 * | -2.1    | -2.3    |
|             | spoIIAF              | Stage III sporulation protein AF                       | [-1.1]  | [-1.2]  | [ 1.5 ] | [ 1.3 ] | -2.8 *  | -4.2 *  | [ 1.4 ] | [-1.1]  | 15.4 *  | 5.9 * | [-1.3]  | -3.4 *  |
|             | spoIIAG              | Stage III sporulation protein AG                       | [-1]    | [-1.4]  | [ 1.4 ] | [ 1.1 ] | -1.9    | -2.3 *  | [ 1.2 ] | [-1]    | 5.8 *   | 3.9 * | [-1.5]  | -2.2    |
|             | spoIIAH              | Stage III sporulation protein AH                       | [-1.2]  | [-1.6]  | [ 2.6 ] | [ 2 ]   | [-1.4]  | [-1.8]  | [ 1.9 ] | [ 1.5 ] | 20 *    | 5.1 * | [-1.2]  | -4.7 *  |

**Table S5.** Operons with genes that are significantly repressed ( $q \leq 0.005$ ) at T3 in an *sda*-dependent manner in the absence of Mn(II).

| Regulator   | Operon               | Regulation                                             | Tm     |        |         |        | T0     |        |         |        | T3     |       |         |        |
|-------------|----------------------|--------------------------------------------------------|--------|--------|---------|--------|--------|--------|---------|--------|--------|-------|---------|--------|
|             |                      |                                                        | Mn +/- |        | sda +/- |        | Mn +/- |        | sda +/- |        | Mn +/- |       | sda +/- |        |
|             |                      |                                                        | sda+   | sda-   | Mn+     | Mn-    | sda+   | sda-   | Mn+     | Mn-    | sda+   | sda-  | Mn+     | Mn-    |
| <b>SigE</b> | yqhV-spolIIAABCDEFGH | SigE (+); SigE (+); SpoIIID (-); SpoIIID (-); YlbO (-) |        |        |         |        |        |        |         |        |        |       |         |        |
|             | yqhV                 | Uncharacterized protein yqhV                           | [-1]   | [-1.1] | [1]     | [1]    | [1]    | [-1.1] | [1.2]   | [1.1]  | 1.7    | 2.3 * | [-1.6]  | [-1.2] |
|             | spolIIAA             | Stage III sporulation protein AA                       | [1]    | [-1.1] | [1.3]   | [1.2]  | [-1.1] | [-1.3] | [1.2]   | [-1]   | 8.3 *  | 5.1 * | [-1.5]  | -2.3 * |
|             | spolIIAB             | Stage III sporulation protein AB                       | [1.2]  | [-1]   | [1.2]   | [1]    | [1.4]  | [1.2]  | [1.1]   | [1]    | 7.3 *  | 5.5 * | [-1.7]  | -2.3   |
|             | spolIIAC             | Stage III sporulation protein AC                       | [-1.2] | [-1]   | [1.1]   | [1.2]  | -4.9 * | -5 *   | [1]     | [1]    | 4.4 *  | 4.2 * | [-1.5]  | [-1.6] |
|             | spolIIAD             | Stage III sporulation protein AD                       | [1.3]  | [-1.1] | [1.5]   | [1.1]  | [-1]   | [-1.1] | [1.1]   | [1.1]  | 8.2 *  | 4.8 * | [-1.5]  | -2.6 * |
|             | spolIIAE             | Stage III sporulation protein AE                       | [1]    | [1]    | [1.1]   | [1.1]  | [-1.2] | [-1.2] | [1.2]   | [1.2]  | 6.8 *  | 6.3 * | -2.1    | -2.3   |
|             | spolIIAF             | Stage III sporulation protein AF                       | [-1.1] | [-1.2] | [1.5]   | [1.3]  | -2.8 * | -4.2 * | [1.4]   | [-1.1] | 15.4 * | 5.9 * | [-1.3]  | -3.4 * |
|             | spolIIAG             | Stage III sporulation protein AG                       | [-1]   | [-1.4] | [1.4]   | [1.1]  | -1.9   | -2.3 * | [1.2]   | [-1]   | 5.8 *  | 3.9 * | [-1.5]  | -2.2   |
|             | spolIIAH             | Stage III sporulation protein AH                       | [-1.2] | [-1.6] | [2.6]   | [2]    | [-1.4] | [-1.8] | [1.9]   | [1.5]  | 20 *   | 5.1 * | [-1.2]  | -4.7 * |
| <b>SigE</b> | yyaD                 | SigE (+)                                               |        |        |         |        |        |        |         |        |        |       |         |        |
|             | yyaD                 | Uncharacterized protein yyaD                           | [1]    | [1.1]  | [-1.1]  | [-1.1] | [1.1]  | [1.3]  | [-1.5]  | [-1.3] | 6.2 *  | 3.8 * | [-1.4]  | -2.2 * |
| <b>SigF</b> | dacF-spolIIAAB-sigF  | SigF (+); SigG (+); SigH (+); Spo0A (+); SpoVT (-)     |        |        |         |        |        |        |         |        |        |       |         |        |
|             | dacF                 | D-alanyl-D-alanine carboxypeptidase                    | [1.1]  | [-1.1] | [1.3]   | [1.1]  | [1.2]  | [-1.1] | [1.2]   | [-1]   | 3 *    | 3.6 * | -1.9    | [-1.6] |
|             | spolIIAA             | Anti-sigma F factor antagonist                         | [-1.2] | [-1.1] | [1.6]   | [1.8]  | [1.1]  | [1.1]  | [1.1]   | [1]    | 4.5 *  | 2.4 * | [-1.5]  | -2.8   |
|             | spolIIAB             | Anti-sigma F factor                                    | [-1.1] | [-1.2] | [1.8]   | [1.5]  | [-1.6] | [-1.6] | [-1.1]  | [-1]   | 10.1 * | 2.5 * | [-1.6]  | -6.7 * |
|             | sigF                 | RNA polymerase sigma-F factor                          | [1.2]  | [1.1]  | [1.2]   | [1.1]  | [1.1]  | [1.3]  | [-1.1]  | [1]    | 3.8 *  | 2.1 * | -1.7    | -3.1 * |
| <b>SigF</b> | rsfA                 | RsfA (-); SigF (+); SigG (+)                           |        |        |         |        |        |        |         |        |        |       |         |        |
|             | rsfA                 | Prespore-specific transcriptional                      | [-1.2] | [-1.2] | [1.6]   | [1.6]  | [-1.8] | -2.2   | [1.3]   | [1.1]  | 10.7 * | 5.2 * | -1.9    | -3.8 * |
| <b>SigF</b> | spolIGA-sigE-sigG    | RsfA (+); SigF (+); SigG (+); Spo0A (+); SpoVT (-)     |        |        |         |        |        |        |         |        |        |       |         |        |
|             | spolIGA              | Sporulation sigma-E factor-processing                  | [1.1]  | [-1.2] | [1.4]   | [1.1]  | [1.2]  | [-1.2] | [1.4]   | [-1.1] | 3.7 *  | 2.3 * | -1.9    | -2.9 * |
|             | sigE                 | RNA polymerase sigma-E factor                          | [1.1]  | [1.2]  | [-1]    | [1.1]  | [1]    | [1.2]  | [-1.1]  | [1.1]  | [1.5]  | [1.4] | -1.5    | -1.6   |
|             | sigG                 | RNA polymerase sigma-G factor                          | [1.2]  | [1.5]  | [1.2]   | [1.5]  | [1.4]  | [1.4]  | [-1]    | [-1]   | 6.1 *  | 2.4 * | -2.4 *  | -5.9 * |
| <b>SigF</b> | spolIQ               | SigF (+)                                               |        |        |         |        |        |        |         |        |        |       |         |        |
|             | spolIQ               | Stage II sporulation protein Q                         | [-1.2] | [-1]   | [1.6]   | [1.9]  | [1.1]  | [-1.5] | [1.3]   | [-1.2] | 21.2 * | 3.8 * | [-1.1]  | -6.1 * |

**Table S5.** Operons with genes that are significantly repressed ( $q \leq 0.005$ ) at T3 in an *sda*-dependent manner in the absence of Mn(II).

| Regulator   | Operon             | Regulation                                         | Tm     |        |         |        | T0     |        |         |        | T3     |       |         |        |
|-------------|--------------------|----------------------------------------------------|--------|--------|---------|--------|--------|--------|---------|--------|--------|-------|---------|--------|
|             |                    |                                                    | Mn +/- |        | sda +/- |        | Mn +/- |        | sda +/- |        | Mn +/- |       | sda +/- |        |
|             |                    |                                                    | sda+   | sda-   | Mn+     | Mn-    | sda+   | sda-   | Mn+     | Mn-    | sda+   | sda-  | Mn+     | Mn-    |
| <b>SigF</b> | spollR             | RsfA (-); SigF (+)                                 |        |        |         |        |        |        |         |        |        |       |         |        |
|             | spollR             | Stage II sporulation protein R                     | [-1.1] | [1]    | [-1.2]  | [-1.1] | [1]    | [-1.2] | [1.2]   | [-1.1] | 8.2 *  | 3.3 * | [-1.5]  | -3.6 * |
| <b>SigF</b> | yphA-seaA          | SigF (+)                                           |        |        |         |        |        |        |         |        |        |       |         |        |
|             | yphA               | Uncharacterized protein yphA                       | [1]    | [1]    | [-1.1]  | [-1]   | [-1.1] | [1.1]  | [-1.2]  | [1.1]  | [-1.1] | [1.4] | [-1.4]  | [1]    |
|             | yphB (seaA)        | Uncharacterized protein yphB                       | [1.1]  | [1.1]  | [1.1]   | [1.1]  | [1.1]  | [1.1]  | [-1.2]  | [-1.2] | 5.3 *  | 2 *   | [-1.3]  | -3.5 * |
| <b>SigF</b> | yuiC               | SigF (+)                                           |        |        |         |        |        |        |         |        |        |       |         |        |
|             | yuiC               | Uncharacterized protein yuiC                       | [1.3]  | [-1]   | [1.2]   | [-1]   | [1]    | [-1.3] | [1.2]   | [-1.1] | 4.7 *  | 5.9 * | -3 *    | -2.4 * |
| <b>SigG</b> | dacF-spollAAB-sigF | SigF (+); SigG (+); SigH (+); Spo0A (+); SpoVT (-) |        |        |         |        |        |        |         |        |        |       |         |        |
|             | dacF               | D-alanyl-D-alanine carboxypeptidase                | [1.1]  | [-1.1] | [1.3]   | [1.1]  | [1.2]  | [-1.1] | [1.2]   | [-1]   | 3 *    | 3.6 * | -1.9    | [-1.6] |
|             | spollAA            | Anti-sigma F factor antagonist                     | [-1.2] | [-1.1] | [1.6]   | [1.8]  | [1.1]  | [1.1]  | [1.1]   | [1]    | 4.5 *  | 2.4 * | [-1.5]  | -2.8   |
|             | spollAB            | Anti-sigma F factor                                | [-1.1] | [-1.2] | [1.8]   | [1.5]  | [-1.6] | [-1.6] | [-1.1]  | [-1]   | 10.1 * | 2.5 * | [-1.6]  | -6.7 * |
|             | sigF               | RNA polymerase sigma-F factor                      | [1.2]  | [1.1]  | [1.2]   | [1.1]  | [1.1]  | [1.3]  | [-1.1]  | [1]    | 3.8 *  | 2.1 * | -1.7    | -3.1 * |
| <b>SigG</b> | rsfA               | RsfA (-); SigF (+); SigG (+)                       |        |        |         |        |        |        |         |        |        |       |         |        |
|             | rsfA               | Prespore-specific transcriptional                  | [-1.2] | [-1.2] | [1.6]   | [1.6]  | [-1.8] | -2.2   | [1.3]   | [1.1]  | 10.7 * | 5.2 * | -1.9    | -3.8 * |
| <b>SigG</b> | spollGA-sigE-sigG  | RsfA (+); SigF (+); SigG (+); Spo0A (+); SpoVT (-) |        |        |         |        |        |        |         |        |        |       |         |        |
|             | spollGA            | Sporulation sigma-E factor-processing              | [1.1]  | [-1.2] | [1.4]   | [1.1]  | [1.2]  | [-1.2] | [1.4]   | [-1.1] | 3.7 *  | 2.3 * | -1.9    | -2.9 * |
|             | sigE               | RNA polymerase sigma-E factor                      | [1.1]  | [1.2]  | [-1]    | [1.1]  | [1]    | [1.2]  | [-1.1]  | [1.1]  | [1.5]  | [1.4] | -1.5    | -1.6   |
|             | sigG               | RNA polymerase sigma-G factor                      | [1.2]  | [1.5]  | [1.2]   | [1.5]  | [1.4]  | [1.4]  | [-1]    | [-1]   | 6.1 *  | 2.4 * | -2.4 *  | -5.9 * |
| <b>SigG</b> | sspK               | SigG (+)                                           |        |        |         |        |        |        |         |        |        |       |         |        |
|             | sspK               | Small, acid-soluble spore protein K                | [1.2]  | [1.1]  | [1]     | [-1]   | [1.3]  | [1.2]  | [1.3]   | [1.2]  | 6 *    | 5.8 * | -1.7 *  | -1.8 * |
| <b>SigG</b> | ykvUV              | SigE (+); SigG (+); SpoIIID (-)                    |        |        |         |        |        |        |         |        |        |       |         |        |
|             | ykvU               | Sporulation protein ykvU                           | [1.1]  | [-1]   | [1.3]   | [1.2]  | [1.1]  | [1.2]  | [1.1]   | [1.2]  | 4.7 *  | 3.9 * | -2      | -2.4 * |
|             | stoA (ykvV)        | Sporulation thiol-disulfide                        | [-1]   | [-1.1] | [1.3]   | [1.1]  | [1.5]  | [1.2]  | [1.3]   | [1]    | 1.7    | 2.8 * | -2 *    | [-1.2] |

**Table S5.** Operons with genes that are significantly repressed ( $q \leq 0.005$ ) at T3 in an *sda*-dependent manner in the absence of Mn(II).

| Regulator   | Operon                                      | Regulation                                         | Tm      |         |         |         | T0      |         |         |         | T3      |         |         |         |
|-------------|---------------------------------------------|----------------------------------------------------|---------|---------|---------|---------|---------|---------|---------|---------|---------|---------|---------|---------|
|             |                                             |                                                    | Mn +/-  |         | sda +/- |         | Mn +/-  |         | sda +/- |         | Mn +/-  |         | sda +/- |         |
|             |                                             |                                                    | sda+    | sda-    | Mn+     | Mn-     | sda+    | sda-    | Mn+     | Mn-     | sda+    | sda-    | Mn+     | Mn-     |
| <b>SigH</b> | <i>dacF</i> - <i>spolIAAB</i> - <i>sigF</i> | SigF (+); SigG (+); SigH (+); Spo0A (+); SpoVT (-) |         |         |         |         |         |         |         |         |         |         |         |         |
|             | <i>dacF</i>                                 | D-alanyl-D-alanine carboxypeptidase                | [ 1.1 ] | [-1.1 ] | [ 1.3 ] | [ 1.1 ] | [ 1.2 ] | [-1.1 ] | [ 1.2 ] | [-1 ]   | 3 *     | 3.6 *   | -1.9    | [-1.6 ] |
|             | <i>spolIAA</i>                              | Anti-sigma F factor antagonist                     | [-1.2 ] | [-1.1 ] | [ 1.6 ] | [ 1.8 ] | [ 1.1 ] | [ 1.1 ] | [ 1.1 ] | [ 1 ]   | 4.5 *   | 2.4 *   | [-1.5 ] | -2.8    |
|             | <i>spolIAB</i>                              | Anti-sigma F factor                                | [-1.1 ] | [-1.2 ] | [ 1.8 ] | [ 1.5 ] | [-1.6 ] | [-1.6 ] | [-1.1 ] | [-1 ]   | 10.1 *  | 2.5 *   | [-1.6 ] | -6.7 *  |
|             | <i>sigF</i>                                 | RNA polymerase sigma-F factor                      | [ 1.2 ] | [ 1.1 ] | [ 1.2 ] | [ 1.1 ] | [ 1.1 ] | [ 1.3 ] | [-1.1 ] | [ 1 ]   | 3.8 *   | 2.1 *   | -1.7    | -3.1 *  |
| <b>SigH</b> | <i>racA</i>                                 | SigH (+); Spo0A (+)                                |         |         |         |         |         |         |         |         |         |         |         |         |
|             | <i>racA</i> ( <i>ywkC</i> )                 | Chromosome-anchoring protein <i>racA</i>           | [-1.2 ] | [ 1.1 ] | [ 1 ]   | [ 1.3 ] | [-1 ]   | [ 1.1 ] | [-1.1 ] | [ 1 ]   | 8 *     | 2.6 *   | [-1.2 ] | -3.6 *  |
| <b>SigK</b> | <i>gerPABCDEF</i>                           | GerE (-); SigK (+)                                 |         |         |         |         |         |         |         |         |         |         |         |         |
|             | <i>gerPA</i>                                | Probable spore germination protein                 | [-1 ]   | [-1.2 ] | [ 1.1 ] | [-1.1 ] | -3.1 *  | -3.9 *  | [ 1.1 ] | [-1.1 ] | 3.4 *   | 3.1 *   | -1.7    | -1.9 *  |
|             | <i>gerPB</i>                                | Probable spore germination protein                 | [ 1.2 ] | [-1.1 ] | [-1.1 ] | [-1.4 ] | [ 1.1 ] | [-1 ]   | [-1.1 ] | [-1.2 ] | [ 1.1 ] | [ 1.3 ] | [-1.2 ] | [-1 ]   |
|             | <i>gerPC</i>                                | Probable spore germination protein                 | [ 1.5 ] | [-1.1 ] | [ 1.3 ] | [-1.3 ] | [ 1.3 ] | [-1 ]   | [ 1.1 ] | [-1.2 ] | 3.5 *   | [ 1.4 ] | [-1.1 ] | -2.7 *  |
|             | <i>gerPD</i>                                | Probable spore germination protein                 | [-1.2 ] | [-1 ]   | [-1.2 ] | [ 1 ]   | -3.6 *  | -3.9 *  | [-1.1 ] | [-1.2 ] | 1.6     | [ 1.5 ] | [-1.4 ] | [-1.5 ] |
|             | <i>gerPE</i>                                | Probable spore germination protein                 | [ 1.1 ] | [ 1.1 ] | [ 1.2 ] | [ 1.2 ] | [ 1.2 ] | [-1.1 ] | [ 1.2 ] | [-1.2 ] | 8.2 *   | 3.5 *   | [-1.2 ] | -2.8 *  |
|             | <i>gerPF</i>                                | Probable spore germination protein                 | [ 1.2 ] | [ 1 ]   | [ 1.3 ] | [ 1.1 ] | [ 1 ]   | [-1 ]   | [-1.2 ] | [-1.3 ] | [ 1.4 ] | [-1.1 ] | [-1.1 ] | [-1.7 ] |
| <b>SigK</b> | <i>sps</i>                                  | SigK (+)                                           |         |         |         |         |         |         |         |         |         |         |         |         |
|             | <i>spsA</i>                                 | Spore coat polysaccharide                          | [-1 ]   | [ 1 ]   | [-1.3 ] | [-1.2 ] | [-1.5 ] | [-1.4 ] | [-1.1 ] | [-1 ]   | 2.1 *   | 2.2 *   | [-1.4 ] | [-1.3 ] |
|             | <i>spsB</i>                                 | Spore coat polysaccharide                          | [-1 ]   | [-1.1 ] | [-1.1 ] | [-1.2 ] | -1.8    | -1.8    | [-1 ]   | [-1 ]   | 1.6     | 1.8 *   | [-1.3 ] | [-1.1 ] |
|             | <i>spsC</i>                                 | Spore coat polysaccharide                          | [-1 ]   | [ 1 ]   | [-1.2 ] | [-1.1 ] | [-1.4 ] | -1.9    | [ 1.3 ] | [-1 ]   | 1.6     | 2.1 *   | -1.7    | [-1.3 ] |
|             | <i>spsD</i>                                 | Spore coat polysaccharide                          | [-1.1 ] | [-1.1 ] | [-1 ]   | [-1.1 ] | [-1.4 ] | [-1.6 ] | [ 1.2 ] | [ 1 ]   | [ 1.2 ] | [ 1.2 ] | [-1 ]   | [-1 ]   |
|             | <i>spsE</i>                                 | Spore coat polysaccharide                          | [ 1.1 ] | [ 1 ]   | [ 1.3 ] | [ 1.2 ] | [ 1.3 ] | [ 1 ]   | [ 1.2 ] | [-1.1 ] | 12.2 *  | 9.6 *   | -2.5 *  | -3.1 *  |
|             | <i>spsF</i>                                 | Spore coat polysaccharide                          | [-1.1 ] | [ 1 ]   | [-1.2 ] | [-1.1 ] | [-1.5 ] | -1.6    | [-1 ]   | [-1.1 ] | [ 1.2 ] | [-1.3 ] | 2.2 *   | [ 1.4 ] |
|             | <i>spsG</i>                                 | Spore coat polysaccharide                          | [ 1.2 ] | [-1.1 ] | [ 1.2 ] | [-1.1 ] | [ 1 ]   | [ 1.2 ] | [-1.2 ] | [ 1 ]   | [ 1.2 ] | 1.6     | [-1.2 ] | [ 1.1 ] |
|             | <i>spsI</i>                                 | Spore coat polysaccharide                          | [-1.1 ] | [-1.1 ] | [ 1 ]   | [-1 ]   | -1.9    | -1.9    | [ 1 ]   | [ 1 ]   | [-1.2 ] | [-1.1 ] | [ 1.1 ] | [ 1.2 ] |
|             | <i>spsJ</i>                                 | Spore coat polysaccharide                          | [ 1.1 ] | [-1.2 ] | [ 1.2 ] | [-1.1 ] | [ 1 ]   | [ 1.1 ] | [-1 ]   | [ 1.1 ] | 1.8     | 4.1 *   | -2.5 *  | [-1 ]   |
|             | <i>spsK</i>                                 | Spore coat polysaccharide                          | [ 1.1 ] | [-1.1 ] | [ 1.2 ] | [-1.1 ] | [ 1.2 ] | [ 1.1 ] | [ 1.3 ] | [ 1.2 ] | 2.3 *   | 3.6 *   | [-1.7 ] | [-1.1 ] |
|             | <i>spsL</i>                                 | Spore coat polysaccharide                          | [ 1.2 ] | [ 1.1 ] | [ 1.1 ] | [ 1.1 ] | 1.6     | 1.5     | [ 1.1 ] | [-1 ]   | [ 1.5 ] | 1.8 *   | [-1.2 ] | [-1 ]   |

**Table S5.** Operons with genes that are significantly repressed ( $q \leq 0.005$ ) at T3 in an *sda*-dependent manner in the absence of Mn(II).

| Regulator    | Operon                                      | Regulation                                         | Tm     |        |         |        | T0     |        |         |        | T3     |        |         |        |
|--------------|---------------------------------------------|----------------------------------------------------|--------|--------|---------|--------|--------|--------|---------|--------|--------|--------|---------|--------|
|              |                                             |                                                    | Mn +/- |        | sda +/- |        | Mn +/- |        | sda +/- |        | Mn +/- |        | sda +/- |        |
|              |                                             |                                                    | sda+   | sda-   | Mn+     | Mn-    | sda+   | sda-   | Mn+     | Mn-    | sda+   | sda-   | Mn+     | Mn-    |
| <b>SigK</b>  | <i>ytaA</i>                                 | SigK (+)                                           |        |        |         |        |        |        |         |        |        |        |         |        |
|              | <i>cotI</i> ( <i>ytaA</i> )                 | Spore coat protein I                               | [1.1]  | [-1.1] | [1.2]   | [-1]   | [-1]   | [-1.2] | [1]     | [-1.1] | 2.9 *  | [1.3]  | [-1.2]  | -2.7 * |
| <b>SinR</b>  | <i>aprE</i>                                 | AbrB (-); DegU (+); Hpr (-); SinR (-); TenA (+)    |        |        |         |        |        |        |         |        |        |        |         |        |
|              | <i>aprE</i>                                 | Subtilisin E                                       | [-1.1] | [-1.2] | [1.4]   | [1.2]  | [1]    | [-1.2] | [1]     | [-1.2] | 2.2 *  | -1.7   | [1.5]   | -2.5 * |
| <b>Spo0A</b> | <i>dacF</i> - <i>spolI</i> AAB- <i>sigF</i> | SigF (+); SigG (+); SigH (+); Spo0A (+); SpoVT (-) |        |        |         |        |        |        |         |        |        |        |         |        |
|              | <i>dacF</i>                                 | D-alanyl-D-alanine carboxypeptidase                | [1.1]  | [-1.1] | [1.3]   | [1.1]  | [1.2]  | [-1.1] | [1.2]   | [-1]   | 3 *    | 3.6 *  | -1.9    | [-1.6] |
|              | <i>spolI</i> AA                             | Anti-sigma F factor antagonist                     | [-1.2] | [-1.1] | [1.6]   | [1.8]  | [1.1]  | [1.1]  | [1.1]   | [1]    | 4.5 *  | 2.4 *  | [-1.5]  | -2.8   |
|              | <i>spolI</i> AB                             | Anti-sigma F factor                                | [-1.1] | [-1.2] | [1.8]   | [1.5]  | [-1.6] | [-1.6] | [-1.1]  | [-1]   | 10.1 * | 2.5 *  | [-1.6]  | -6.7 * |
|              | <i>sigF</i>                                 | RNA polymerase sigma-F factor                      | [1.2]  | [1.1]  | [1.2]   | [1.1]  | [1.1]  | [1.3]  | [-1.1]  | [1]    | 3.8 *  | 2.1 *  | -1.7    | -3.1 * |
| <b>Spo0A</b> | <i>racA</i>                                 | SigH (+); Spo0A (+)                                |        |        |         |        |        |        |         |        |        |        |         |        |
|              | <i>racA</i> ( <i>ywkC</i> )                 | Chromosome-anchoring protein <i>racA</i>           | [-1.2] | [1.1]  | [1]     | [1.3]  | [-1]   | [1.1]  | [-1.1]  | [1]    | 8 *    | 2.6 *  | [-1.2]  | -3.6 * |
| <b>Spo0A</b> | <i>skI</i>                                  | AbrB (-); PhoP (+); Spo0A (+)                      |        |        |         |        |        |        |         |        |        |        |         |        |
|              | <i>skfA</i> ( <i>ybcO</i> )                 | Sporulation-killing factor <i>skfA</i>             | [-1]   | [-1.2] | [1.4]   | [1.2]  | [1.1]  | [-1.2] | [1.2]   | [-1.1] | [1.8]  | 2.5    | [-1.9]  | [-1.3] |
|              | <i>skfB</i> ( <i>ybcP</i> )                 | Uncharacterized protein <i>skfB</i>                | [-1.1] | [-1.1] | [1.1]   | [1]    | [-1.3] | [-1.1] | [-1.1]  | [1.1]  | 1.9 *  | [-1.2] | [1.3]   | -1.7   |
|              | <i>skfC</i> ( <i>ybcS</i> )                 | Sporulation-killing factor biosynthesis            | [1]    | [-1.1] | [-1.1]  | [-1.2] | [1.3]  | [1.4]  | [-1.4]  | [-1.3] | 3.9 *  | [1.4]  | [1]     | -2.7 * |
|              | <i>skfC</i> ( <i>ybcS</i> )                 | Sporulation-killing factor biosynthesis            | [-1.1] | [-1.1] | [1]     | [-1]   | [-1.1] | [-1.1] | [1]     | [-1]   | 2.1 *  | [-1.3] | 1.7 *   | -1.6   |
|              | <i>skfE</i> ( <i>ybdA</i> )                 | SkfA peptide export ATP-binding                    | [-1]   | [-1]   | [1.2]   | [1.2]  | [-1.1] | [1.3]  | [-1.9]  | [-1.3] | 5.6 *  | [-1]   | [1.7]   | -3.3 * |
|              | <i>skfF</i> ( <i>ybdB</i> )                 | Putative bacteriocin- <i>skfA</i> transport        | [-1]   | [1.3]  | [-1.2]  | [1.1]  | [1.1]  | [1.4]  | [-1.2]  | [1.1]  | 2.5 *  | [-1.3] | [1.1]   | -2.9 * |
|              | <i>skfG</i> ( <i>ybdD</i> )                 | Uncharacterized protein <i>skfG</i>                | [1]    | [-1]   | [1.1]   | [1]    | [-1.1] | [-1.2] | [-1.3]  | [-1.3] | [1.2]  | [-1.4] | [1.3]   | [-1.3] |
|              | <i>skfH</i> ( <i>ybdE</i> )                 | Thioredoxin-like protein <i>skfH</i>               | [-1.4] | [-1.2] | [1.1]   | [1.2]  | -1.6   | [-1.3] | [-1.4]  | [-1.1] | 3.2 *  | [-1.2] | [1.1]   | -3.4 * |
| <b>Spo0A</b> | <i>spolI</i> E                              | Spo0A (+)                                          |        |        |         |        |        |        |         |        |        |        |         |        |
|              | <i>spolI</i> E                              | Stage II sporulation protein E                     | [1]    | [1.1]  | [1]     | [1.1]  | [1]    | [-1.2] | [1.1]   | [-1.1] | 3.4 *  | 1.7    | -2.2 *  | -4.5 * |
| <b>Spo0A</b> | <i>spolI</i> GA- <i>sigE</i> - <i>sigG</i>  | RsfA (+); SigF (+); SigG (+); Spo0A (+); SpoVT (-) |        |        |         |        |        |        |         |        |        |        |         |        |
|              | <i>spolI</i> GA                             | Sporulation sigma-E factor-processing              | [1.1]  | [-1.2] | [1.4]   | [1.1]  | [1.2]  | [-1.2] | [1.4]   | [-1.1] | 3.7 *  | 2.3 *  | -1.9    | -2.9 * |
|              | <i>sigE</i>                                 | RNA polymerase sigma-E factor                      | [1.1]  | [1.2]  | [-1]    | [1.1]  | [1]    | [1.2]  | [-1.1]  | [1.1]  | [1.5]  | [1.4]  | -1.5    | -1.6   |
|              | <i>sigG</i>                                 | RNA polymerase sigma-G factor                      | [1.2]  | [1.5]  | [1.2]   | [1.5]  | [1.4]  | [1.4]  | [-1]    | [-1]   | 6.1 *  | 2.4 *  | -2.4 *  | -5.9 * |

**Table S5.** Operons with genes that are significantly repressed ( $q \leq 0.005$ ) at T3 in an *sda*-dependent manner in the absence of Mn(II).

| Regulator      | Operon      | Regulation                           | Tm     |        |         |        | T0     |        |         |        | T3     |        |         |        |
|----------------|-------------|--------------------------------------|--------|--------|---------|--------|--------|--------|---------|--------|--------|--------|---------|--------|
|                |             |                                      | Mn +/- |        | sda +/- |        | Mn +/- |        | sda +/- |        | Mn +/- |        | sda +/- |        |
|                |             |                                      | sda+   | sda-   | Mn+     | Mn-    | sda+   | sda-   | Mn+     | Mn-    | sda+   | sda-   | Mn+     | Mn-    |
| <b>Spo0A</b>   | yneEF       | Spo0A (+)                            |        |        |         |        |        |        |         |        |        |        |         |        |
|                | sirA (yneE) | Sporulation inhibitor of replication | [-1.1] | [-1.1] | [-1]    | [-1]   | [-1.2] | [-1.2] | [-1.1]  | [-1.1] | 1.9 *  | 1.6 *  | -1.6    | -1.9 * |
|                | yneF        | UPF0154 protein yneF                 | [1]    | [1.2]  | [-1.2]  | [1]    | [-1]   | [1.2]  | [-1.3]  | [1]    | [1.4]  | [-1.1] | [1.3]   | [-1.1] |
| <b>Spo0A</b>   | yppDE       | Spo0A (+)                            |        |        |         |        |        |        |         |        |        |        |         |        |
|                | yppD        | Uncharacterized protein yppD         | [1.1]  | [1.1]  | [1.1]   | [1.1]  | [1]    | [1]    | [-1.1]  | [-1.1] | 2.7 *  | 1.8 *  | [-1.5]  | -2.2 * |
|                | yppE        | Uncharacterized protein yppE         | [-1.3] | [-1.2] | [-1]    | [1]    | -1.7   | [-1.5] | [1]     | [1.2]  | 2.9 *  | [1.1]  | [-1.1]  | -2.9 * |
| <b>Spo0A</b>   | yttP        | PhoP (+); Spo0A (+)                  |        |        |         |        |        |        |         |        |        |        |         |        |
|                | yttP        | Probable HTH-type transcriptional    | [-1.2] | [-1.2] | [1.1]   | [1.1]  | [-1.1] | [-1.4] | [1.3]   | [1]    | 6.4 *  | 1.9    | [1]     | -3.2 * |
| <b>Spo0A</b>   | yusED       | Spo0A (+)                            |        |        |         |        |        |        |         |        |        |        |         |        |
|                | yusE        | Thioredoxin-like protein yusE        | [1]    | [1]    | [-1.1]  | [-1.1] | [-1.2] | [-1.2] | [1.1]   | [1.1]  | [-1.1] | [-1]   | [1.3]   | [1.3]  |
|                | yusD        | Uncharacterized protein yusD         | [1]    | [1.1]  | [1.1]   | [1.2]  | [-1.4] | [-1.3] | [1]     | [1.1]  | 2.9 *  | [1.4]  | [-1.1]  | -2.3 * |
| <b>SpoIIID</b> | spoIVA      | SigE (+); SpoIIID (-)                |        |        |         |        |        |        |         |        |        |        |         |        |
|                | spoIVA      | Stage IV sporulation protein A       | [-1.1] | [-1.1] | [1.3]   | [1.3]  | [-1.1] | [-1.4] | [1.2]   | [-1]   | 18.5 * | 4.3 *  | [-1]    | -4.4 * |
| <b>SpoIIID</b> | spoIVFAB    | SigE (+); SpoIIID (-)                |        |        |         |        |        |        |         |        |        |        |         |        |
|                | spoIVFA     | Stage IV sporulation protein FA      | [1]    | [-1.1] | [1.4]   | [1.2]  | [-1]   | [-1.1] | [1.1]   | [1]    | 9 *    | 4.8 *  | -1.6    | -3 *   |
|                | spoIVFB     | Stage IV sporulation protein FB      | [-1.1] | [-1.1] | [-1.1]  | [-1]   | -2.2 * | -2.2 * | [-1.2]  | [-1.2] | 2.5 *  | 2.8 *  | [-1.5]  | [-1.4] |
| <b>SpoIIID</b> | ykvUV       | SigE (+); SigG (+); SpoIIID (-)      |        |        |         |        |        |        |         |        |        |        |         |        |
|                | ykvU        | Sporulation protein ykvU             | [1.1]  | [-1]   | [1.3]   | [1.2]  | [1.1]  | [1.2]  | [1.1]   | [1.2]  | 4.7 *  | 3.9 *  | -2      | -2.4 * |
|                | stoA (ykvV) | Sporulation thiol-disulfide          | [-1]   | [-1.1] | [1.3]   | [1.1]  | [1.5]  | [1.2]  | [1.3]   | [1]    | 1.7    | 2.8 *  | -2 *    | [-1.2] |

**Table S5.** Operons with genes that are significantly repressed ( $q \leq 0.005$ ) at T3 in an *sda*-dependent manner in the absence of Mn(II).

| Regulator     | Operon                              | Regulation                                           | Tm     |        |         |       | T0     |        |         |        | T3     |       |         |        |
|---------------|-------------------------------------|------------------------------------------------------|--------|--------|---------|-------|--------|--------|---------|--------|--------|-------|---------|--------|
|               |                                     |                                                      | Mn +/- |        | sda +/- |       | Mn +/- |        | sda +/- |        | Mn +/- |       | sda +/- |        |
|               |                                     |                                                      | sda+   | sda-   | Mn+     | Mn-   | sda+   | sda-   | Mn+     | Mn-    | sda+   | sda-  | Mn+     | Mn-    |
| <b>SpoIID</b> | yqhV-spoIIIAABCDEFGH                | SigE (+); SigE (+); SpoIID (-); SpoIID (-); YlbO (-) |        |        |         |       |        |        |         |        |        |       |         |        |
| yqhV          | Uncharacterized protein yqhV        |                                                      | [-1]   | [-1.1] | [1]     | [1]   | [1]    | [-1.1] | [1.2]   | [1.1]  | 1.7    | 2.3 * | [-1.6]  | [-1.2] |
| spoIIAA       | Stage III sporulation protein AA    |                                                      | [1]    | [-1.1] | [1.3]   | [1.2] | [-1.1] | [-1.3] | [1.2]   | [-1]   | 8.3 *  | 5.1 * | [-1.5]  | -2.3 * |
| spoIIAB       | Stage III sporulation protein AB    |                                                      | [1.2]  | [-1]   | [1.2]   | [1]   | [1.4]  | [1.2]  | [1.1]   | [1]    | 7.3 *  | 5.5 * | [-1.7]  | -2.3   |
| spoIIAC       | Stage III sporulation protein AC    |                                                      | [-1.2] | [-1]   | [1.1]   | [1.2] | -4.9 * | -5 *   | [1]     | [1]    | 4.4 *  | 4.2 * | [-1.5]  | [-1.6] |
| spoIIAD       | Stage III sporulation protein AD    |                                                      | [1.3]  | [-1.1] | [1.5]   | [1.1] | [-1]   | [-1.1] | [1.1]   | [1.1]  | 8.2 *  | 4.8 * | [-1.5]  | -2.6 * |
| spoIIAE       | Stage III sporulation protein AE    |                                                      | [1]    | [1]    | [1.1]   | [1.1] | [-1.2] | [-1.2] | [1.2]   | [1.2]  | 6.8 *  | 6.3 * | -2.1    | -2.3   |
| spoIIAF       | Stage III sporulation protein AF    |                                                      | [-1.1] | [-1.2] | [1.5]   | [1.3] | -2.8 * | -4.2 * | [1.4]   | [-1.1] | 15.4 * | 5.9 * | [-1.3]  | -3.4 * |
| spoIIAG       | Stage III sporulation protein AG    |                                                      | [-1]   | [-1.4] | [1.4]   | [1.1] | -1.9   | -2.3 * | [1.2]   | [-1]   | 5.8 *  | 3.9 * | [-1.5]  | -2.2   |
| spoIIAH       | Stage III sporulation protein AH    |                                                      | [-1.2] | [-1.6] | [2.6]   | [2]   | [-1.4] | [-1.8] | [1.9]   | [1.5]  | 20 *   | 5.1 * | [-1.2]  | -4.7 * |
| <b>SpoIID</b> | yqhV-spoIIIAABCDEFGH                | SigE (+); SigE (+); SpoIID (-); SpoIID (-); YlbO (-) |        |        |         |       |        |        |         |        |        |       |         |        |
| yqhV          | Uncharacterized protein yqhV        |                                                      | [-1]   | [-1.1] | [1]     | [1]   | [1]    | [-1.1] | [1.2]   | [1.1]  | 1.7    | 2.3 * | [-1.6]  | [-1.2] |
| spoIIAA       | Stage III sporulation protein AA    |                                                      | [1]    | [-1.1] | [1.3]   | [1.2] | [-1.1] | [-1.3] | [1.2]   | [-1]   | 8.3 *  | 5.1 * | [-1.5]  | -2.3 * |
| spoIIAB       | Stage III sporulation protein AB    |                                                      | [1.2]  | [-1]   | [1.2]   | [1]   | [1.4]  | [1.2]  | [1.1]   | [1]    | 7.3 *  | 5.5 * | [-1.7]  | -2.3   |
| spoIIAC       | Stage III sporulation protein AC    |                                                      | [-1.2] | [-1]   | [1.1]   | [1.2] | -4.9 * | -5 *   | [1]     | [1]    | 4.4 *  | 4.2 * | [-1.5]  | [-1.6] |
| spoIIAD       | Stage III sporulation protein AD    |                                                      | [1.3]  | [-1.1] | [1.5]   | [1.1] | [-1]   | [-1.1] | [1.1]   | [1.1]  | 8.2 *  | 4.8 * | [-1.5]  | -2.6 * |
| spoIIAE       | Stage III sporulation protein AE    |                                                      | [1]    | [1]    | [1.1]   | [1.1] | [-1.2] | [-1.2] | [1.2]   | [1.2]  | 6.8 *  | 6.3 * | -2.1    | -2.3   |
| spoIIAF       | Stage III sporulation protein AF    |                                                      | [-1.1] | [-1.2] | [1.5]   | [1.3] | -2.8 * | -4.2 * | [1.4]   | [-1.1] | 15.4 * | 5.9 * | [-1.3]  | -3.4 * |
| spoIIAG       | Stage III sporulation protein AG    |                                                      | [-1]   | [-1.4] | [1.4]   | [1.1] | -1.9   | -2.3 * | [1.2]   | [-1]   | 5.8 *  | 3.9 * | [-1.5]  | -2.2   |
| spoIIAH       | Stage III sporulation protein AH    |                                                      | [-1.2] | [-1.6] | [2.6]   | [2]   | [-1.4] | [-1.8] | [1.9]   | [1.5]  | 20 *   | 5.1 * | [-1.2]  | -4.7 * |
| <b>SpoVT</b>  | dacF-spoIIAAB-sigF                  | SigF (+); SigG (+); SigH (+); Spo0A (+); SpoVT (-)   |        |        |         |       |        |        |         |        |        |       |         |        |
| dacF          | D-alanyl-D-alanine carboxypeptidase |                                                      | [1.1]  | [-1.1] | [1.3]   | [1.1] | [1.2]  | [-1.1] | [1.2]   | [-1]   | 3 *    | 3.6 * | -1.9    | [-1.6] |
| spoIIAA       | Anti-sigma F factor antagonist      |                                                      | [-1.2] | [-1.1] | [1.6]   | [1.8] | [1.1]  | [1.1]  | [1.1]   | [1]    | 4.5 *  | 2.4 * | [-1.5]  | -2.8   |
| spoIIAB       | Anti-sigma F factor                 |                                                      | [-1.1] | [-1.2] | [1.8]   | [1.5] | [-1.6] | [-1.6] | [-1.1]  | [-1]   | 10.1 * | 2.5 * | [-1.6]  | -6.7 * |
| sigF          | RNA polymerase sigma-F factor       |                                                      | [1.2]  | [1.1]  | [1.2]   | [1.1] | [1.1]  | [1.3]  | [-1.1]  | [1]    | 3.8 *  | 2.1 * | -1.7    | -3.1 * |

**Table S5.** Operons with genes that are significantly repressed ( $q \leq 0.005$ ) at T3 in an *sda*-dependent manner in the absence of Mn(II).

| Regulator    | Operon               | Regulation                                             | Tm       |          |          |          | T0       |          |          |          | T3      |         |          |          |
|--------------|----------------------|--------------------------------------------------------|----------|----------|----------|----------|----------|----------|----------|----------|---------|---------|----------|----------|
|              |                      |                                                        | Mn +/-   |          | sda +/-  |          | Mn +/-   |          | sda +/-  |          | Mn +/-  |         | sda +/-  |          |
|              |                      |                                                        | sda+     | sda-     | Mn+      | Mn-      | sda+     | sda-     | Mn+      | Mn-      | sda+    | sda-    | Mn+      | Mn-      |
| <b>SpoVT</b> | spolIGA-sigE-sigG    | RsfA (+); SigF (+); SigG (+); Spo0A (+); SpoVT (-)     |          |          |          |          |          |          |          |          |         |         |          |          |
|              | spolIGA              | Sporulation sigma-E factor-processing                  | [ 1.1 ]  | [ -1.2 ] | [ 1.4 ]  | [ 1.1 ]  | [ 1.2 ]  | [ -1.2 ] | [ 1.4 ]  | [ -1.1 ] | 3.7 *   | 2.3 *   | -1.9     | -2.9 *   |
|              | sigE                 | RNA polymerase sigma-E factor                          | [ 1.1 ]  | [ 1.2 ]  | [ -1 ]   | [ 1.1 ]  | [ 1 ]    | [ 1.2 ]  | [ -1.1 ] | [ 1.1 ]  | [ 1.5 ] | [ 1.4 ] | -1.5     | -1.6     |
|              | sigG                 | RNA polymerase sigma-G factor                          | [ 1.2 ]  | [ 1.5 ]  | [ 1.2 ]  | [ 1.5 ]  | [ 1.4 ]  | [ 1.4 ]  | [ -1 ]   | [ -1 ]   | 6.1 *   | 2.4 *   | -2.4 *   | -5.9 *   |
| <b>TenA</b>  | aprE                 | AbrB (-); DegU (+); Hpr (-); SinR (-); TenA (+)        |          |          |          |          |          |          |          |          |         |         |          |          |
|              | aprE                 | Subtilisin E                                           | [ -1.1 ] | [ -1.2 ] | [ 1.4 ]  | [ 1.2 ]  | [ 1 ]    | [ -1.2 ] | [ 1 ]    | [ -1.2 ] | 2.2 *   | -1.7    | [ 1.5 ]  | -2.5 *   |
| <b>TnrA</b>  | glnQHMP              | TnrA (+)                                               |          |          |          |          |          |          |          |          |         |         |          |          |
|              | glnQ                 | Glutamine transport ATP-binding                        | [ 1.1 ]  | [ -1.2 ] | [ 1.5 ]  | [ 1.2 ]  | [ 1.1 ]  | [ -1.4 ] | [ 1.7 ]  | [ 1.1 ]  | 3.3 *   | 7.4 *   | -3.3 *   | [ -1.5 ] |
|              | glnH                 | ABC transporter glutamine-binding                      | [ -1.2 ] | [ 1 ]    | [ 1.4 ]  | [ 1.6 ]  | [ -1.1 ] | [ 1.4 ]  | [ -3.4 ] | [ -2.1 ] | 5.8 *   | 2.7 *   | [ -1.6 ] | -3.3 *   |
|              | glnM                 | Probable glutamine ABC transporter                     | [ -1.3 ] | [ -1.7 ] | [ 1.1 ]  | [ -1.2 ] | -2.1     | -2.2     | [ 1.1 ]  | [ 1 ]    | [ 1.2 ] | 2.8 *   | -2.1     | [ 1.1 ]  |
|              | glnP                 | Probable glutamine ABC transporter                     | [ -1.1 ] | [ -1.1 ] | [ 1.1 ]  | [ 1 ]    | [ -1.1 ] | [ -1.3 ] | [ -1.3 ] | [ -1.5 ] | [ 1.4 ] | [ 1.4 ] | -1.8 *   | -1.9 *   |
| <b>TnrA</b>  | ykbZ-ykoL            | PhoP (+); TnrA (+)                                     |          |          |          |          |          |          |          |          |         |         |          |          |
|              | ykbZ                 | Uncharacterized protein ykbZ                           | [ 1 ]    | [ 1.2 ]  | [ -1.3 ] | [ -1.2 ] | [ 1.3 ]  | 1.7      | [ -1.3 ] | [ -1 ]   | 4.3 *   | 4 *     | -1.8     | -1.9 *   |
|              | ykoL                 | Stress response protein ykoL                           | [ -1 ]   | [ -1 ]   | [ -1.1 ] | [ -1 ]   | [ 1.2 ]  | [ 1.1 ]  | [ -1.1 ] | [ -1.2 ] | 2.3 *   | 1.9 *   | [ -1 ]   | [ -1.2 ] |
| <b>YlbO</b>  | yqhV-spolIIAABCDEFGH | SigE (+); SigE (+); SpoIIID (-); SpoIIID (-); YlbO (-) |          |          |          |          |          |          |          |          |         |         |          |          |
|              | yqhV                 | Uncharacterized protein yqhV                           | [ -1 ]   | [ -1.1 ] | [ 1 ]    | [ 1 ]    | [ 1 ]    | [ -1.1 ] | [ 1.2 ]  | [ 1.1 ]  | 1.7     | 2.3 *   | [ -1.6 ] | [ -1.2 ] |
|              | spolIIAA             | Stage III sporulation protein AA                       | [ 1 ]    | [ -1.1 ] | [ 1.3 ]  | [ 1.2 ]  | [ -1.1 ] | [ -1.3 ] | [ 1.2 ]  | [ -1 ]   | 8.3 *   | 5.1 *   | [ -1.5 ] | -2.3 *   |
|              | spolIIAB             | Stage III sporulation protein AB                       | [ 1.2 ]  | [ -1 ]   | [ 1.2 ]  | [ 1 ]    | [ 1.4 ]  | [ 1.2 ]  | [ 1.1 ]  | [ 1 ]    | 7.3 *   | 5.5 *   | [ -1.7 ] | -2.3     |
|              | spolIIAC             | Stage III sporulation protein AC                       | [ -1.2 ] | [ -1 ]   | [ 1.1 ]  | [ 1.2 ]  | -4.9 *   | -5 *     | [ 1 ]    | [ 1 ]    | 4.4 *   | 4.2 *   | [ -1.5 ] | [ -1.6 ] |
|              | spolIIAD             | Stage III sporulation protein AD                       | [ 1.3 ]  | [ -1.1 ] | [ 1.5 ]  | [ 1.1 ]  | [ -1 ]   | [ -1.1 ] | [ 1.1 ]  | [ 1.1 ]  | 8.2 *   | 4.8 *   | [ -1.5 ] | -2.6 *   |
|              | spolIIAE             | Stage III sporulation protein AE                       | [ 1 ]    | [ 1 ]    | [ 1.1 ]  | [ 1.1 ]  | [ -1.2 ] | [ -1.2 ] | [ 1.2 ]  | [ 1.2 ]  | 6.8 *   | 6.3 *   | -2.1     | -2.3     |
|              | spolIIAF             | Stage III sporulation protein AF                       | [ -1.1 ] | [ -1.2 ] | [ 1.5 ]  | [ 1.3 ]  | -2.8 *   | -4.2 *   | [ 1.4 ]  | [ -1.1 ] | 15.4 *  | 5.9 *   | [ -1.3 ] | -3.4 *   |
|              | spolIIAG             | Stage III sporulation protein AG                       | [ -1 ]   | [ -1.4 ] | [ 1.4 ]  | [ 1.1 ]  | -1.9     | -2.3 *   | [ 1.2 ]  | [ -1 ]   | 5.8 *   | 3.9 *   | [ -1.5 ] | -2.2     |
|              | spolIIAH             | Stage III sporulation protein AH                       | [ -1.2 ] | [ -1.6 ] | [ 2.6 ]  | [ 2 ]    | [ -1.4 ] | [ -1.8 ] | [ 1.9 ]  | [ 1.5 ]  | 20 *    | 5.1 *   | [ -1.2 ] | -4.7 *   |

Numbers indicate fold-change (log10)

Brackets: Not significant;  $q > 0.05$  or fold-change  $< \log_2 0.6$  (= 1.5-fold)No brackets: Significant;  $q \leq 0.005$  (asterisk) or  $q \leq 0.05$  (no asterisk) and fold-change  $\geq \log_2 (0.6)$  (= 1.5-fold)



Hoover et al. (2010)

**Table S6.** Genes with significant changes in expression ( $q \leq 0.05$ ) at the mid-exponential time point.

| Gene |                                         | Tm      |         |         |        | T0      |         |         |        | T3      |         |         |        |
|------|-----------------------------------------|---------|---------|---------|--------|---------|---------|---------|--------|---------|---------|---------|--------|
|      |                                         | Mn +/-  |         | sda +/- |        | Mn +/-  |         | sda +/- |        | Mn +/-  |         | sda +/- |        |
|      |                                         | sda+    | sda-    | Mn+     | Mn-    | sda+    | sda-    | Mn+     | Mn-    | sda+    | sda-    | Mn+     | Mn-    |
| aadK | Aminoglycoside 6-adenylyltransferase    | -2.5    | -2.4    | [-1]    | [1]    | -2.4 *  | -2.6 *  | [1.1]   | [1.1]  | -2.7 *  | -2.8 *  | [1.1]   | [1]    |
| immR | HTH-type transcriptional regulator immR | [1.2]   | [-1.4]  | 3.7     | [2.1]  | [1]     | [-1.3]  | [2.5]   | [1.8]  | [-1]    | 1.8     | [1.4]   | 2.5    |
| katA | Vegetative catalase                     | [-3]    | -7.5 *  | [1.9]   | [-1.3] | -13.8 * | -17.9 * | [1.5]   | [1.1]  | -6 *    | -10.9 * | [1.2]   | [-1.5] |
| mntA | Manganese-binding lipoprotein mntA      | [-2.6]  | -6.6    | [2.8]   | [1.1]  | -7.2 *  | -17.9 * | [2.2]   | [-1.1] | -11.1 * | -27.2 * | [2.2]   | [-1.1] |
| mntB | Manganese transport system ATP-         | -15.3 * | -19.9 * | [1.9]   | [1.4]  | -28 *   | -57.4 * | [2.1]   | [1]    | -28.6 * | -11.8 * | [-1.5]  | [1.6]  |
| mntC | Manganese transport system membrane     | -4.2    | -7.6 *  | [2.1]   | [1.2]  | -7.7 *  | -14.3 * | [1.6]   | [-1.2] | -16.1 * | -10.4 * | [-1.1]  | [1.4]  |
| mntD | Manganese transport system membrane     | [-2.9]  | -6.9    | [2.2]   | [-1]   | -6.5 *  | -14.4 * | [2.1]   | [-1]   | -11 *   | -19.3 * | [1.6]   | [-1.1] |
| mntH | Manganese transport protein mntH        | -13 *   | -11.7 * | [1.3]   | [1.4]  | -28.9 * | -32.6 * | [1.2]   | [1]    | -32.4 * | -29.9 * | [1.1]   | [1.2]  |
| pksB | Probable polyketide biosynthesis zinc-  | -4.2 *  | -4.7 *  | [1.1]   | [-1]   | -2.7 *  | -3.7 *  | [1.3]   | [-1]   | -2.7 *  | -4.2 *  | [1.5]   | [-1]   |
| slp  | Pal-related lipoprotein                 | [1.6]   | 2.4 *   | [-1.4]  | [1]    | 1.5     | 1.7     | [-1.2]  | [-1.1] | [1.2]   | [1.2]   | [-1.5]  | -1.5   |
| ydzA | Uncharacterized membrane protein ydzA   | [-2.2]  | -3.3    | [1.5]   | [-1]   | -4.1 *  | -6.4 *  | [1.4]   | [-1.1] | -3.8 *  | -6.4 *  | [1.2]   | [-1.4] |
| yknV | Uncharacterized ABC transporter ATP-    | -11.6 * | -13.7 * | [1.4]   | [1.2]  | -6.6 *  | -16.6 * | [2.9]   | [1.1]  | -25.5 * | -8.8 *  | -2.6    | [1.1]  |
| yqbK | Uncharacterized protein yqbK            | -2.5 *  | -3.1 *  | [1.1]   | [-1.1] | -2.3 *  | -2.7 *  | [1.2]   | [1]    | -2.1 *  | -2.7 *  | [1.4]   | [1.1]  |

Brackets: Not significant;  $q > 0.05$  or fold-change  $< \log_2 0.6$  (= 1.5-fold)  
 No brackets: Significant;  $q \leq 0.005$  (asterisk) or  $q \leq 0.05$  (no asterisk)  
 and fold-change  $\geq \log_2 (0.6)$  (= 1.5-fold)

**Hoover et al. (2010)**

**Table S7.** Fold-differences in relative expression for genes in the PerR regulon.

Numbers indicate fold-change (log10)

Brackets: Not significant;  $q > 0.05$  or fold-change  $< \log_2 0.6$  (= 1.5-fold)

No brackets: Significant;  $q \leq 0.005$  (asterisk) or  $q \leq 0.05$  (no asterisk) and fold-change  $\geq \log_2(0.6)$  (= 1.5-fold)

| Regulator - Operon - Regulation |           |                                       | Tm     |        |         |        | T0      |         |         |        | T3     |         |         |        |
|---------------------------------|-----------|---------------------------------------|--------|--------|---------|--------|---------|---------|---------|--------|--------|---------|---------|--------|
|                                 |           |                                       | Mn +/- |        | sda +/- |        | Mn +/-  |         | sda +/- |        | Mn +/- |         | sda +/- |        |
|                                 |           |                                       | sda+   | sda-   | Mn+     | Mn-    | sda+    | sda-    | Mn+     | Mn-    | sda+   | sda-    | Mn+     | Mn-    |
| <b>PerR</b>                     | ahpCF     | PerR (-)                              |        |        |         |        |         |         |         |        |        |         |         |        |
|                                 | ahpC      | Alkyl hydroperoxide reductase subunit | [-1.5] | [-1.8] | [-1.3]  | [-1.5] | [-1.3]  | [-1.2]  | [1]     | [1.1]  | -2.1   | -1.6    | [-1.2]  | [1.1]  |
|                                 | ahpF      | NADH dehydrogenase                    | [-3.5] | [-1.9] | [-1.3]  | [1.4]  | -3.2    | [-2.3]  | [-1.1]  | [1.3]  | -6.4 * | -3.7 *  | [-1.5]  | [1.1]  |
| <b>PerR</b>                     | fur       | PerR (-)                              |        |        |         |        |         |         |         |        |        |         |         |        |
|                                 | fur       | Ferric uptake regulation protein      | [1.1]  | [-1.4] | [1.4]   | [-1.1] | [-1.5]  | [-1.4]  | [1.1]   | [1.1]  | [1.2]  | [-1.2]  | [-1.1]  | [-1.6] |
| <b>PerR</b>                     | hemAXCDBL | PerR (-)                              |        |        |         |        |         |         |         |        |        |         |         |        |
|                                 | hemA      | Glutamyl-tRNA reductase               | [-1]   | [-1.5] | [1.6]   | [1.1]  | [-1.3]  | [-1.4]  | [-1.4]  | [-1.5] | [-1]   | -2.3 *  | [1.3]   | [-1.7] |
|                                 | hemX      | Protein hemX                          | [-1]   | [-1.1] | [1]     | [-1.1] | -1.9    | -1.6    | [-1.2]  | [-1]   | [-1.4] | -1.6    | [-1.1]  | [-1.2] |
|                                 | hemC      | Porphobilinogen deaminase             | [-1.1] | [-1.3] | [1.3]   | [1]    | [1.1]   | [1]     | [-1.1]  | [-1.1] | [-1.3] | -1.8    | [1.1]   | [-1.2] |
|                                 | hemD      | Uroporphyrinogen-III synthase         | [-1.4] | [-1.5] | [1]     | [-1]   | [-1.4]  | [-1.3]  | [-1.2]  | [-1.1] | -2.2 * | -2.5 *  | [-1.1]  | [-1.2] |
|                                 | hemB      | Delta-aminolevulinic acid dehydratase | [-1.3] | [-1.3] | [1.1]   | [1.1]  | [-1.2]  | [-1.5]  | [1.2]   | [-1.1] | -1.7   | -2 *    | [1.1]   | [-1]   |
|                                 | hemL      | Glutamate-1-semialdehyde 2,1-         | [-1.5] | [-1.6] | [-1]    | [-1.1] | [-1.3]  | [-1.4]  | [1]     | [-1.1] | -2 *   | -3.3 *  | [1.3]   | [-1.2] |
| <b>PerR</b>                     | katA      | PerR (-)                              |        |        |         |        |         |         |         |        |        |         |         |        |
|                                 | katA      | Vegetative catalase                   | [-3]   | -7.5 * | [1.9]   | [-1.3] | -13.8 * | -17.9 * | [1.5]   | [1.1]  | -6 *   | -10.9 * | [1.2]   | [-1.5] |
| <b>PerR</b>                     | mrgA      | PerR (-)                              |        |        |         |        |         |         |         |        |        |         |         |        |
|                                 | mrgA      | Metalloreulation DNA-binding stress   | [1.2]  | [1.1]  | [1.3]   | [1.2]  | [1]     | [-1.3]  | [1]     | [-1.3] | [-1]   | -1.8 *  | [-1.2]  | -2.1 * |
| <b>PerR</b>                     | perR      | PerR (-)                              |        |        |         |        |         |         |         |        |        |         |         |        |
|                                 | perR      | Peroxide operon regulator             | [-1.7] | [-1.5] | [-1.1]  | [1.1]  | -2.1 *  | -2.3 *  | [1.1]   | [1]    | -2.9 * | -4 *    | [1.2]   | [-1.2] |

**Table S7.** Fold-differences in relative expression for genes in the PerR regulon.

| Regulator   | Operon                       | Regulation                                                 | Tm     |        |         |        | T0     |        |         |        | T3     |        |         |        |
|-------------|------------------------------|------------------------------------------------------------|--------|--------|---------|--------|--------|--------|---------|--------|--------|--------|---------|--------|
|             |                              |                                                            | Mn +/- |        | sda +/- |        | Mn +/- |        | sda +/- |        | Mn +/- |        | sda +/- |        |
|             |                              |                                                            | sda+   | sda-   | Mn+     | Mn-    | sda+   | sda-   | Mn+     | Mn-    | sda+   | sda-   | Mn+     | Mn-    |
| <b>PerR</b> | srfAA-srfAB-comS-srfAC-srfAD | CodY (-); ComA (+); PerR (+); Spx (+)                      |        |        |         |        |        |        |         |        |        |        |         |        |
|             | srfAA                        | Surfactin synthetase subunit 1                             | [1.2]  | [1.4]  | [-1]    | [1.1]  | 1.8 *  | 2.3 *  | [-1.1]  | [1.1]  | [1.3]  | -1.7 * | 2.8 *   | [1.3]  |
|             | srfAB                        | Surfactin synthetase subunit 2                             | [1]    | [1]    | [1]     | [1]    | 2      | [1.3]  | [1.6]   | [1]    | [1]    | [1.1]  | [1.5]   | [1.6]  |
|             | comS                         | Competence protein S                                       | [1.4]  | [1.3]  | [-1.2]  | [-1.2] | 2.8 *  | 2.5 *  | [1.2]   | [1]    | [1.3]  | [-1.4] | 1.9     | [1]    |
|             | srfAC                        | Surfactin synthetase subunit 3                             | [1.2]  | [1.2]  | [1.1]   | [1]    | 1.8 *  | 1.8 *  | [1.1]   | [1.1]  | [1.1]  | [-1.2] | 2 *     | [1.4]  |
|             | srfAD                        | Surfactin synthetase thioesterase                          | [1.1]  | [1.2]  | [-1.1]  | [1]    | 1.8    | 2 *    | [-1.1]  | [-1]   | [-1.2] | -2.1 * | 1.9 *   | [1.1]  |
| <b>PerR</b> | yjbCD                        | PerR (-); SigB (+); SigM (+); SigW (+); SigX (+); YodB (-) |        |        |         |        |        |        |         |        |        |        |         |        |
|             | yjbC                         | Putative acetyltransferase yjbC                            | [-1.2] | [-1.5] | [1]     | [-1.2] | [-1.3] | [-1.7] | [1.2]   | [-1.1] | 2.1    | 2.4    | [-1.6]  | [-1.3] |
|             | spxA (yjbD)                  | Regulatory protein spx                                     | [-1.3] | [-1.7] | [1]     | [-1.2] | -2.4   | -3     | [1.4]   | [1.1]  | [-1.2] | [-1.6] | [-1.2]  | [-1.6] |
| <b>PerR</b> | ykvW                         | PerR (-)                                                   |        |        |         |        |        |        |         |        |        |        |         |        |
|             | zosA (ykvW)                  | Zinc-transporting ATPase                                   | [1.1]  | [-1.2] | [1]     | [-1.2] | [-1.3] | [-1.2] | [1]     | [1.1]  | [-1.4] | -2 *   | [-1.1]  | [-1.5] |

Numbers indicate fold-change (log10)

Brackets: Not significant;  $q > 0.05$  or fold-change  $< \log_2 0.6$  (= 1.5-fold)

No brackets: Significant;  $q \leq 0.005$  (asterisk) or  $q \leq 0.05$  (no asterisk) and fold-change  $\geq \log_2 (0.6)$  (= 1.5-fold)
